# Supplementary material for: Harnessing asymmetric N-heterocyclic carbene ligands to optimise SABRE hyperpolarisation
Source: Catal Sci Technol. 2018 Sep 3;8(19):4925–33. doi: 10.1039/c8cy01214h (PMC6171487; doi:10.1039/c8cy01214h)
Supplement: Supplementary file 1 [file CY-008-C8CY01214H-s001.pdf]

# Supporting Information for

## **Harnessing asymmetric N-heterocyclic carbene ligands to optimise SABRE hyperpolarisation**

Chin Min Wong,<sup>a,b</sup> Marianna Fekete,<sup>c</sup> Rhianna Nelson-Forde,<sup>c</sup> Mark R. D. Gatus,<sup>b</sup> Peter J. Rayner,<sup>c</sup> Adrian C. Whitwood,<sup>c</sup> Simon B. Duckett,<sup>\*c</sup> and Barbara A. Messerle.<sup>\*b</sup>

---

*a.* School of Chemistry, University of New South Wales, Sydney 2052, Australia.

*b.* Department of Molecular Sciences, Macquarie University, North Ryde 2109, Australia

*c.* Centre for Hyperpolarisation in Magnetic Resonance, York Science Park, University of York, Heslington, York YO10 5NY, United Kingdom

*\* email: [simon.duckett@york.ac.uk](mailto:simon.duckett@york.ac.uk), [barbara.messerle@mq.edu.au](mailto:barbara.messerle@mq.edu.au)*

**Table of contents:**

|                                                                                    |    |
|------------------------------------------------------------------------------------|----|
| Harnessing asymmetric carbenes to optimise SABRE hyperpolarisation .....           | 1  |
| General Experimental Procedures and Characterisation Data .....                    | 3  |
| General Procedure for preparation of NMR samples for SABRE analysis .....          | 4  |
| General calculation for $^1\text{H}$ NMR enhancement factors.....                  | 5  |
| General calculation for $^{13}\text{C}$ NMR enhancement factors .....              | 5  |
| Synthesis of Complexes .....                                                       | 9  |
| Characterisation of active complexes in the presence of pyridine .....             | 13 |
| Characterisation of the active complex formed in the presence of 3,4-lutidine..... | 16 |
| Characterisation of the active complex formed in the presence of 3,5-lutidine..... | 19 |
| Ligand exchange rates and proton NMR signal enhancement.....                       | 24 |
| SABRE experiments, using Flow-apparatus.....                                       | 26 |
| $^{13}\text{C}$ NMR enhancements data .....                                        | 31 |
| X-Ray analysis of 1e .....                                                         | 34 |
| References .....                                                                   | 46 |

## **General Experimental Procedures and Characterisation Data**

Unless otherwise stated, all manipulations were carried out under inert atmosphere using standard Schlenk techniques or in a nitrogen or argon-filled Braun glovebox. All reagents were purchased from Aldrich Chemical Company Inc. or Alfa Aesar Inc. and used as received unless otherwise noted.  $\text{IrCl}_3 \cdot x\text{H}_2\text{O}$  was purchased from Precious Metals Online PMO P/L. For the purposes of air sensitive manipulations and in the preparation of air sensitive metal complexes dichloromethane, acetonitrile, diethyl ether and pentane were dispensed from a PuraSolv solvent purification system. Methanol and hexane were used as received. The bulk compressed gases argon (>99.999%) were obtained from Air Liquide and used as received. Nitrogen gas for Schlenk line operation comes from in-house liquid nitrogen boil-off.  $[\text{Ir}(\text{COD})\text{Cl}]_2$ ,<sup>1</sup> 1-phenyl-1*H*-imidazole,<sup>2</sup> 1-mesityl-1*H*-imidazole,<sup>3</sup> 3-methyl-1-phenyl-1*H*-imidazol-3-ium iodide,<sup>4</sup> 1-mesityl-3-methyl-1*H*-imidazol-3-ium iodide,<sup>4</sup> 1-mesityl-3-methyl-1*H*-imidazol-3-ium tetraphenylborate<sup>5</sup> and  $[\text{Ir}(\text{IMes})\text{CODCl}]$  (**1a**)<sup>6</sup> were synthesized using literature procedures. Parahydrogen (*p*- $\text{H}_2$ ) was prepared by cooling dihydrogen over  $\text{Fe}_2\text{O}_3$  at 28K and introduced to the NMR tube using a home-built generator. For the flow measurements, *parahydrogen* was supplied using a Bruker *parahydrogen* generator.

$^1\text{H}$  and  $^{13}\text{C}\{^1\text{H}\}$  NMR spectra were recorded on Bruker Avance III series spectrometers operating at 400, 500 and 600 MHz ( $^1\text{H}$ ) and 100, 125 and 150 MHz ( $^{13}\text{C}$ ) and 50.7 MHz ( $^{15}\text{N}$ ) respectively.  $^1\text{H}$  and  $^{13}\text{C}$  NMR chemical shifts were referenced internally to residual solvent resonances.  $^{15}\text{N}$  NMR chemical shifts were referenced externally to  $^{15}\text{N}$ -urea. Unless otherwise stated, spectra were recorded at 298 K and chemical shifts ( $\delta$ ), with uncertainties  $\pm 0.01$  Hz for  $^1\text{H}$  and  $\pm 0.05$  Hz for  $^{13}\text{C}$  and  $^{15}\text{N}$ , are quoted in parts per million, ppm. Coupling constants ( $J$ ) are quoted in Hz and have uncertainties of  $\pm 0.05$  Hz for  $^1\text{H}$ - $^1\text{H}$  and  $^1\text{H}$ - $^{15}\text{N}$  and  $\pm 0.5$  Hz for  $^{13}\text{C}$ - $^{11}\text{B}$  and  $^{15}\text{N}$ - $^{15}\text{N}$ . Deuterated solvents were purchased from Cambridge Stable Isotopes or Sigma Aldrich and used as received. Air sensitive NMR samples were prepared in an inert gas glovebox or by vacuum transfer of deuterated solvents into NMR tubes fitted with a Young's teflon valve. For air sensitive NMR samples, dichloromethane- $d_2$  and chloroform- $d$  were distilled over calcium hydride. Microanalyses were carried out at the at the Campbell Micro-analytical Laboratory, University of Otago, New Zealand or at the Research School of Chemistry, The Australian National University, Canberra, Australia or at the Chemical Analysis Facility, Department of Chemistry and Biomolecular Sciences,

Macquarie University, Sydney, Australia.. Mass spectra were acquired using a Thermo LTQ Orbitrap XL located in the Bioanalytical Mass Spectrometry Facility (BMSF) in UNSW. M is defined as the molecular weight of the compound of interest or cationic fragment for cationic metal complexes.

### **General Procedure for preparation of NMR samples for SABRE analysis**

SABRE experiments were conducted either in a 5 mm NMR tubes fitted with Young's valves (Method 1) or an automated polarizer (Method 2).

#### **Method 1**

NMR samples were prepared in 5 mm NMR tubes fitted with Young's valves. Samples were degassed three times on a high vacuum Schlenk line whilst immersing the solution in a dry CO<sub>2</sub>/acetone slush bath prior to *p*-H<sub>2</sub> (3 bar) addition. Typical procedures for reactions with pyridine, 3,4-lutidine and 3,5-lutidine are described. NMR characterisation data was collected using a range of 1D and 2D methods that include nOe, COSY and HMQC procedures. In a typical experiment, the iridium complex, [Ir(NHC)CODCl] (**1a-1e**) (5 mM), and five equivalents of either pyridine, 3,4-lutidine or 3,5-lutidine (25 mM) were dissolved in methanol-*d*<sub>4</sub> (0.6 ml). The bright yellow mixture was degassed and *para*hydrogen at a pressure of 3 bar was added. When the samples were analysed at 298K, samples were then shaken for 10 s at 65 G of the NMR spectrometer before rapidly transported into the magnet for NMR measurements. When the samples were analysed at 313K, the samples were first placed in a water bath at 313K for 3 minutes. The samples were then quickly shaken for 10 s at 65G of the NMR spectrometer before rapidly transported into the magnet, which was previously heated to 313K for NMR measurements.

#### **Method 2**

The automated polarizer method was used to analyse a mixture containing [Ir(NHC)CODCl] (**1a**, **1d**, **1e**) (5 mM) and 3,4-lutidine or 3,5-lutidine (25 mM) in methanol-*d*<sub>4</sub> (3 mL) at 313K. The solvent, catalyst and substrate were placed in a glass enclosed tube with two side arms (mixing chamber). The mixing chamber was placed in a tuneable copper coil (0-140 G) situated in a magnetic field, All magnitudes of the magnetic field in which polarization transfer occurs are stated without correction for this local field. The system is entirely

automated - the liquid and gas flow from the mixing chamber are computer controlled *via* the pulse program. The mixing chamber was heated within by an external circulating heated water pump to 313K. *Parahydrogen* was introduced continuously through an external *parahydrogen* generator into the mixing chamber to activate the catalyst. Nitrogen gas was used to transfer the hyperpolarized solution from the mixing chamber to the NMR probe head for measurement. Before taking a measurement  $^1\text{H}$  NMR measurement, the *parahydrogen* bubbling time into the mixture was set to be 10s. Before taking a measurement  $^{13}\text{C}$  NMR measurement, the *parahydrogen* bubbling time into the mixture was set to be 30s. The transportation time was calibrated to 0.4 s. A further delay of 0.5 s was allowed for settling of the sample prior to signal acquisition.

### **General calculation for $^1\text{H}$ NMR enhancement factors**

The  $^1\text{H}$  NMR signal enhancement was calculated by using the following equation:

*signal enhancement*

$$= \frac{\text{signal of polarized sample measured by integral}}{\text{signal of unpolarized sample measured by integral}}$$

The reference spectrum, or the spectrum of the unpolarised sample was measured using the same hyperpolarised sample, were recorded after it had fully relaxed. The reference spectrum and the hyperpolarized spectrum were measured using the same acquisition, delay and receiver gain parameters. The raw integrals of the relevant resonances in the reference and the hyperpolarized spectra were used to determine the enhancement levels using the equation above. The results are not corrected for relaxation losses during the transfer time (0.9 s for flow measurements and *ca.* 4 s for NMR tube measurements) into the NMR magnet and hence reflect experimentally observed values.

### **General calculation for $^{13}\text{C}$ NMR enhancement factors**

$^{13}\text{C}$  enhancements were calculated by taking the raw integral of the  $^{13}\text{CD}_3\text{OD}$  peak observed from the solvent in the sample after equilibration inside the magnet for 1 minute.  $^{13}\text{CD}_3\text{OD}$  was present in each sample at a concentration of 24.6 M and the resulting SABRE hyperpolarized signal was then scaled according to the concentration of substrate in solution relative to the methanol signal to give the final enhancement value for  $^{13}\text{C}$ .<sup>7</sup>

## Synthesis of ligands

### Synthesis of MesIBn.Br

Mesityl imidazole (250 mg, 1.34 mmol) was dissolved in acetonitrile (20 mL). Benzyl bromide (248 mg, 1.45 mmol) was then added dropwise to the brown mixture. The mixture was stirred and heated at reflux overnight. The brown mixture was cooled to room temperature and the solvent was evaporated to give a dark brown oily residue. The crude product was dissolved in a small amount of methanol (3 mL) and diethyl ether (30 mL) was added to the mixture with stirring to give the product as a fluffy off-white solid.

Yield: 407 mg, 85%

$^1\text{H}$  NMR ( $(\text{CD}_3)_2\text{SO}$ , 600 MHz, 298K):  $\delta$  9.57 (br s, 1H, Im-H2), 8.06 (t,  $^3J_{\text{H-H}} = 1.6$  Hz, 1H, Im-H4), 7.95 (t,  $^3J_{\text{H-H}} = 1.8$  Hz, 1H, Im-H5), 7.44 (m, 5H, *ortho*-CH, *meta*-CH and *para*-CH of phenyl ring), 7.15 (s, 2H, *meta*-CH of Mes), 5.53 (s, 2H, CH<sub>2</sub>), 2.33 (s, 3H, *para*-CH<sub>3</sub> of Mes), 2.00 (s, 6H, *ortho*-CH<sub>3</sub> of Mes) ppm.

$^{13}\text{C}\{^1\text{H}\}$  NMR ( $(\text{CD}_3)_2\text{SO}$ , 150 MHz, 298K):  $\delta$  140.3 (*para*-CCH<sub>3</sub> of Mes), 137.6 (Im-C2), 134.7 (C<sub>q</sub> of phenyl ring), 134.2 (*ortho*-CCH<sub>3</sub> of Mes), 131.1 (C<sub>q</sub> of Mes), 129.3 (*meta*-CH of Mes), 129.2 (*ortho*-CH of phenyl ring), 128.9 (*meta*-CH of phenyl ring), 128.0 (*para*-CH of phenyl ring), 124.4 (Im-C5), 123.3 (Im-C4), 52.4 (CH<sub>2</sub>), 20.6 (*para*-CH<sub>3</sub> of Mes), 16.9 (*ortho*-CH<sub>3</sub> of Mes) ppm.

HR-MS (ESI<sup>+</sup>, MeOH) :  $m/z$  (%): (100 %)  $[\text{M}]^+ = [\text{C}_{19}\text{H}_{21}\text{N}_2]^+ = 277.1693$  (Calculated  $[\text{M}]^+ = 277.1699$ ) amu.

### Synthesis of MesIBn.BPh<sub>4</sub>

MesIBn.Br (166 mg, 0.464 mmol) was dissolved in dichloromethane (15 mL) and sodium tetraphenylborate (163 mg, 0.476 mmol) was added to the colourless solution. White precipitate immediately forms. The mixture was left to stir for 1 hour and then it was filtered through celite and washed thoroughly with dichloromethane. The solvent was evaporated to give the product as a crystalline off-white fluffy solid.

Yield: 217 mg, 78 %

$^1\text{H}$  NMR ( $\text{CDCl}_3$ , 600 MHz, 298K):  $\delta$  7.39 (br s, 8H, *ortho*-CH of BPh<sub>4</sub>) overlapped with 7.37 (m, 3H, *ortho*-CH and *meta*-CH of Ar), 7.04 (s, 2H, *meta*-CH of Mes), 6.89 (t,  $^3J_{\text{H-H}} = 7.5$  Hz, 8H, *meta*-CH of BPh<sub>4</sub>) overlapped with 6.87 (m, 2H, *para*-CH of Ar), 6.81 (t,  $^3J_{\text{H-H}} = 7.2$  Hz, 4H, *para*-CH of BPh<sub>4</sub>), 6.04 (t,  $^3J_{\text{H-H}} = 1.7$  Hz, 1H, Im-H4/5), 6.55 (t,  $^3J_{\text{H-H}} = 1.6$  Hz, 1H, Im-H4/5), 5.45 (t,  $^3J_{\text{H-H}} = 1.6$  Hz, 1H, Im-H2), 4.08 (s, 2H, CH<sub>2</sub>), 2.41 (s, 3H, *para*-CH of Mes), 1.89 (s, 6H, *ortho*-CH of Mes) ppm.

HR-MS (ESI<sup>+</sup>, MeOH) :  $m/z$  (%): (100 %)  $[\text{M}]^+ = [\text{C}_{19}\text{H}_{21}\text{N}_2]^+ = 277.1698$  (Calculated  $[\text{M}]^+ = 277.1699$ ) amu.

### Synthesis of MesIEtPh.Br

Mesityl imidazole (575 mg, 3.62 mmol) was dissolved in acetonitrile (20 mL). 2-Phenylethyl bromide (1000 mg, 5.43 mmol) was then added dropwise to the brown mixture. The mixture was stirred and heated at reflux overnight. The brown mixture was cooled to room temperature and the solvent was evaporated to give a dark brown oily residue. The crude product was dissolved in a small amount of methanol (3 mL) and diethyl ethyl (30 mL) was added to the mixture with stirring to give the product as a fluffy off-white solid.

Yield: 773 mg, 58%

$^1\text{H}$  NMR ( $\text{CD}_3\text{OD}$ , 400 MHz, 298K):  $\delta$  9.20 (t,  $^3J_{\text{H-H}} = 1.5$  Hz, 1H, Im-H2), 8.04 (t,  $^3J_{\text{H-H}} = 1.7$  Hz, 1H, Im-H4), 7.85 (t,  $^3J_{\text{H-H}} = 1.8$  Hz, 1H, Im-H5), 7.29 (apparent t,  $^3J_{\text{H-H}} = 7.3$  Hz, 2H, *meta*-CH of phenyl ring), 7.23 (apparent t,  $^3J_{\text{H-H}} = 7.3$  Hz, 1H, *para*-CH of phenyl ring), 7.20 (apparent d,  $^3J_{\text{H-H}} = 7.3$  Hz, 2H, *ortho*-CH of phenyl ring), 7.10 (s, 2H, *meta*-CH of Mes), 4.58 (t,  $^3J_{\text{H-H}} = 6.7$  Hz, 2H, ImN-CH<sub>2</sub>), 3.24 (t,  $^3J_{\text{H-H}} = 6.8$  Hz, 2H, Ar-CH<sub>2</sub>), 2.30 (s, 3H, *para*-CH<sub>3</sub> of Mes), 1.84 (s, 6H, *ortho*-CH<sub>3</sub> of Mes) ppm.

$^{13}\text{C}\{^1\text{H}\}$  NMR ( $\text{CD}_3\text{OD}$ , 100 MHz, 298K):  $\delta$  140.2 (*para*-CCH<sub>3</sub> of Mes), 137.1 (Im-C2), 136.5 (C<sub>q</sub> of phenyl ring), 134.2 (*ortho*-CCH<sub>3</sub> of Mes), 131.0 (C<sub>q</sub> of Mes), 129.1 (*meta*-CH of Mes), 128.7 (*ortho*-CH of phenyl ring), 128.6 (*meta*-CH of phenyl ring), 126.9 (*para*-CH of phenyl ring), 123.9 (Im-C5), 123.1 (Im-C4), 50.3 (ImN-CH<sub>2</sub>), 34.9 (Ar-CH<sub>2</sub>), 20.5 (*para*-CH<sub>3</sub> of Mes), 16.6 (*ortho*-CH<sub>3</sub> of Mes) ppm.

HR-MS (ESI<sup>+</sup>, MeOH) :  $m/z$  (%): (100 %)  $[\text{M}]^+ = [\text{C}_{20}\text{H}_{23}\text{N}_2]^+ = 291.1854$  (Calculated  $[\text{M}]^+ = 291.1856$ ) amu.

### Synthesis of MesIEtPh.BPh<sub>4</sub>

MesIEtPh.Br (146 mg, 0.392 mmol) was dissolved in dichloromethane (15 mL) and sodium tetraphenylborate (137 mg, 0.401 mmol) was added to the colourless solution. White precipitate immediately forms. The mixture was left to stir for 1 hour and then it was filtered through celite and washed thoroughly with dichloromethane. The solvent was evaporated to give the product as a crystalline off-white fluffy solid.

Yield: 222 mg, 93%

<sup>1</sup>H NMR (CDCl<sub>3</sub>, 600 MHz, 298K):  $\delta$  7.37 (br s, 8H, *ortho*-CH of BPh<sub>4</sub>), 7.23 (m, 3H, *ortho*-CH and *meta*-CH of Ar), 6.98 (s, 2H, *meta*-CH of Mes), 6.90 (t, <sup>3</sup>J<sub>H-H</sub> = 7.4 Hz, 8H, *meta*-CH of BPh<sub>4</sub>), 6.81 (m, 2H, *para*-CH of Ar) overlapped with 6.79 (t, <sup>3</sup>J<sub>H-H</sub> = 7.4 Hz, 4H, *para*-CH of BPh<sub>4</sub>), 6.51 (br s, 1H, Im-H4/5), 6.43 (br s, 1H, Im-H4/5), 5.25 (t, <sup>3</sup>J<sub>H-H</sub> = 1.5 Hz, 1H, Im-H2), 3.37 (t, <sup>3</sup>J<sub>H-H</sub> = 6.3 Hz, 2H, ImN-CH<sub>2</sub>), 2.69 (t, <sup>3</sup>J<sub>H-H</sub> = 6.3 Hz, 2H, ImN-CH<sub>2</sub>), 2.38 (s, 3H, *para*-CH of Mes), 1.68 (s, 6H, *ortho*-CH of Mes) ppm.

HR-MS (ESI<sup>+</sup>, MeOH) : *m/z* (%): (100 %) [M]<sup>+</sup> = [C<sub>20</sub>H<sub>23</sub>N<sub>2</sub>]<sup>+</sup> = 291.1853 (Calculated [M]<sup>+</sup> = 291.1856) amu.

### Synthesis of Complexes

#### [Ir(PhIme)CODCl] (1b)

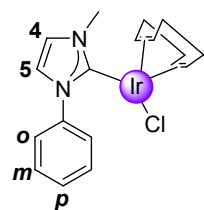

1-methyl-3-phenyl-1*H*-imidazolium iodide (304 mg, 1.07 mmol), Ag<sub>2</sub>O (186 mg, 0.802 mmol) and [Ir(COD)<sub>2</sub>Cl]<sub>2</sub> (374 mg, 0.566 mmol) were added to dichloromethane (20 mL) and the mixture was stirred for 16 h. The reaction mixture was then filtered through celite and the solvent removed

from the filtrate (*in vacuo*). The complex [Ir(PhIme)CODCl] (**1b**) was recrystallised by dissolving the crude solid obtained from the filtrate in the minimum amount of dichloromethane and adding excess *n*-hexane to the mixture until a yellow precipitate was obtained. The precipitate was filtered to yield the desired complex **6** as a yellow solid.

Yield: 368 mg, 0.749 mmol, 70 %.

$^1\text{H}$  NMR ( $\text{CDCl}_3$ , 400 MHz, 298K):  $\delta$  7.99 (m, 2H, *meta*-CH of phenyl), 7.49 (m, 2H, *ortho*-CH of phenyl), 7.40 (m, 1H, *para*-CH of phenyl), 7.13 (d, 1H, Im-H5), 6.98 (d, 1H, Im-H4), 4.68 (m, 1H, =CH-COD), 4.50 (m, 1H, =CH of COD), 4.08 (s, 3H, CH<sub>3</sub>), 2.88 (m, 1H, =CH of COD), 2.22 (m, 1H, sp<sup>2</sup>-COD), 2.15 (m, 2H, =CH of COD), 1.90 (m 1H, CH<sub>2</sub> of COD), 1.62 (m, 1H, CH<sub>2</sub> of COD), 1.54 (m, 2H, CH<sub>2</sub> of COD), 1.35 (m, 1H, CH<sub>2</sub> of COD), 1.21 (m, 1H, CH<sub>2</sub> of COD) ppm.

$^{13}\text{C}\{^1\text{H}\}$  NMR ( $\text{CDCl}_3$ , 100 MHz, 298K):  $\delta$  180.9 (Im-C2), 140.1 (C<sub>q</sub> of phenyl), 128.8 (*ortho*-CH of phenyl), 127.9 (*para*-CH of phenyl), 125.3 (*meta*-CH of phenyl), 122.5 (Im-C4), 121.1 (Im-C5), 84.2 (=CH of COD), 83.8 (=CH of COD), 51.9 (=CH of COD), 51.7 (=CH of COD), 38.3 (C8), 34.2 (CH<sub>2</sub> of COD), 32.6 (CH<sub>2</sub> of COD), 29.6 (CH<sub>2</sub> of COD), 29.5 (CH<sub>2</sub> of COD) ppm.

Elemental Anal. found: 43.58; H, 4.55; N, 5.56 %; calculated for C<sub>18</sub>H<sub>22</sub>ClIrN<sub>2</sub>: C, 43.76; H, 4.49; N, 5.67 %. ESI-MS (MeOH),  $m/z$  (%): 457.33 (95) [M-Cl]<sup>+</sup> amu.

#### [Ir(MesIme)CODCl] (1c)

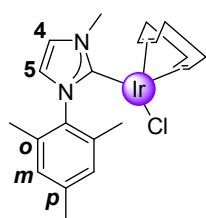

1-mesityl-3-methyl-1*H*-imidazol-3-ium tetraphenylborate (106 mg, 0.203 mmol) and K<sub>2</sub>CO<sub>3</sub> (140 mg, 1.02 mmol) were added to acetone (30 mL). After 10 min of stirring the mixture [Ir(COD)<sub>2</sub>Cl]<sub>2</sub> (69.6 mg, 0.104 mmol) was added, the mixture turned a light orange colour and the mixture was refluxed for 4 h. The solvent was removed in vacuo and the crude mixture

redissolved dichloromethane (20 mL) and the mixture was filtered through celite. 80 mL of *n*-hexane was added to the filtrate and the solvent was reduced to ca. 70 mL, heated to 60 °C and filtered through celite (while hot) to remove any traces of BPh<sub>4</sub> salts. The solvent was removed in vacuo to yield the complex [Ir(MesIme)CODCl] (**1c**) as a yellow solid.

Yield: 98.1 mg, 0.183 mmol, 90%.

$^1\text{H}$  NMR: ( $\text{CD}_2\text{Cl}_2$ , 600 MHz, 298K):  $\delta$  7.09 (d,  $^3J_{\text{H-H}} = 1.7$  Hz, 1H, Im-H4), 7.05 (br d, 1H, *meta*-CH of Mes), 6.96 (br d, 1H, *meta*-CH of Mes), 6.81 (d,  $^3J_{\text{H-H}} = 1.7$  Hz, 1H, Im-H5), 4.39-4.28 (m, 2H, =CH of COD), 4.11 (s, 3H, Im-N-CH<sub>3</sub>), 3.17 (m, 1H, =CH of COD), 2.73 (m, 1H, =CH of COD), 2.38 (s, 3H, *para*-CH<sub>3</sub> of Mes), 2.30 (s, 3H, *ortho*-CH<sub>3</sub> of Mes), 2.25-2.16 (m, 1H, CH<sub>2</sub> of COD), 2.11-2.01 (m, 1H, CH<sub>2</sub> of COD), 1.93 (s, 3H, *ortho*-CH<sub>3</sub> of Mes), 1.85-1.76 (m, 1H, CH<sub>2</sub> of COD), 1.63-1.55 (m, 2H, CH<sub>2</sub> of COD), 1.53-1.38 (m, 2H, CH<sub>2</sub> of COD), 1.25-1.17 (m, 1H, CH<sub>2</sub> of COD) ppm.

$^{13}\text{C}\{^1\text{H}\}$  NMR ( $\text{CD}_2\text{Cl}_2$ , 150 MHz, 298K):  $\delta$  180.6 (Im-C2), 139.0 (*para*-CCH<sub>3</sub> of Mes), 137.05 (*ortho*-CCH<sub>3</sub> of Mes), 136.3 (*ipso*-C<sub>q</sub> of Mes), 134.9 (*ortho*-CCH<sub>3</sub> of Mes), 129.6 (*meta*-CH of Mes), 128.5 (*meta*-CH of Mes), 123.1 (Im-H5), 122.4 (Im-H4), 82.99 (=CH of COD), 83.0 (=CH of COD), 52.0 (=CH of COD), 50.7 (=CH of COD), 38.7 (Im-N-CH<sub>3</sub>), 35.1 (CH<sub>2</sub> of COD), 32.7 (CH<sub>2</sub> of COD), 30.1 (CH<sub>2</sub> of COD), 29.0 (CH<sub>2</sub> of COD), 21.2 (*para*-CH<sub>3</sub> of Mes), 19.6 (*ortho*-CH<sub>3</sub> of Mes), 18.0 (*ortho*-CH<sub>3</sub> of Mes) ppm.

Elemental Anal. found: C, 45.90; H, 5.43; N, 4.87 %; calculated for  $\text{C}_{21}\text{H}_{28}\text{ClIrN}_2 + \text{H}_2\text{O}$ : C, 45.52; H, 5.46; N, 5.06 %. ESI-MS (MeOH),  $m/z$  (%): 449.19 (100)  $[\text{M}-\text{Cl}]^+$ , 559.17 (55)  $[\text{M}+\text{Na}]^+$  amu.

#### $[\text{Ir}(\text{MesIBn})\text{CODCl}]$ (**1d**)

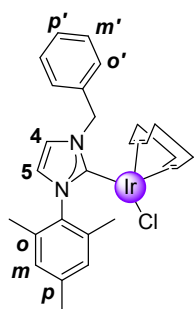

MesIBn.BPh<sub>4</sub> (101 mg, 0.170 mmol) was dissolved partially in acetone (20 mL). K<sub>2</sub>CO<sub>3</sub> (127 mg, 0.920 mmol) was added and the suspension was stirred for 15 minutes at room temperature prior to the addition of  $[\text{Ir}(\text{COD})\text{Cl}]_2$  (57.2 mg, 0.0852 mmol). The bright orange mixture was heated at reflux for 4 hours, at which point the mixture looks orange-yellow in colour. After cooling to room temperature, the mixture was filtered through celite and evaporated to give an orange-yellow residue. The residue was redissolved in dichloromethane (20 mL), whereby white solid precipitates out. The mixture was filtered through celite and the solvent was evaporated to give an orange-yellow solid. The solid was then redissolved in hexane (30 mL) and heated with stirring in a water bath at about 40 °C for about 15 minutes. The yellow solution was filtered and collected. These two steps were repeated twice more until only a small amount of brown solid is remains undissolved. All the collected yellow solution were combined and reduced in volume to *ca.* 10 mL. The solution was cooled in the freezer overnight to give **1d** as yellow needle-like crystals.

Yield: 67.7 mg, 0.111 mmol, 65%

$^1\text{H}$  NMR ( $\text{CD}_2\text{Cl}_2$ , 600 MHz, 298K):  $\delta$  7.41 (m, 4H, *ortho*- and *meta*-CH of phenyl ring), 7.35 (m, 1H, *para*-CH of phenyl ring), 7.04 (s, 1H, *meta*-CH of Mes), 6.97 (d,  $^3J_{\text{H-H}} = 1.98$  Hz, 1H, Im-H4), 6.94 (s, 1H, *meta*-CH of Mes), 6.80 (d,  $^3J_{\text{H-H}} = 1.98$  Hz, 1H, Im-H5), 6.10 (d,  $^2J_{\text{H-H}} = 15.1$  Hz, 1H, CH<sub>2</sub>), 5.57 (d,  $^2J_{\text{H-H}} = 15.1$  Hz, 1H, CH<sub>2</sub>), 4.37 (dt,  $^3J_{\text{H-H}} = 11.8$  Hz,  $^3J_{\text{H-H}} = 3.94$  Hz, 1H, =CH of COD), 4.30 (dt,  $^3J_{\text{H-H}} = 11.8$  Hz,  $^3J_{\text{H-H}} = 3.94$  Hz, 1H, =CH of

COD), 2.96 (dt,  $^3J_{\text{H-H}} = 11.8$  Hz,  $^3J_{\text{H-H}} = 3.94$  Hz, 1H, =CH of COD), 2.74 (dt,  $^3J_{\text{H-H}} = 11.8$  Hz,  $^3J_{\text{H-H}} = 3.94$  Hz, 1H, =CH of COD), 2.36 (s, 3H, *para*-CH<sub>3</sub> of Mes), 2.32 (s, 3H, *ortho*-CH<sub>3</sub> of Mes), 1.97 (m, 1H, CH<sub>2</sub> of COD), 1.92 (s, 3H, *ortho*-CH<sub>3</sub> of Mes), 1.89 (m, 1H, CH<sub>2</sub> of COD), 1.77 (m, 1H, CH<sub>2</sub> of COD), 1.51 (m, 1H, CH<sub>2</sub> of COD), 1.41 (m, 3H, CH<sub>2</sub> of COD), 1.18 (m, 1H, CH<sub>2</sub> of COD) ppm.

$^{13}\text{C}\{^1\text{H}\}$  NMR (CD<sub>2</sub>Cl<sub>2</sub>, 150 MHz, 298K):  $\delta$  180.9 (Im-C2), 139.1 (*para*-CCH<sub>3</sub> of Mes), 137.6 (C<sub>q</sub> of phenyl ring), 137.0 (*ortho*-CCH<sub>3</sub> of Mes), 136.3 (C<sub>q</sub> of Mes), 134.9 (*ortho*-CCH<sub>3</sub> of Mes), 129.6 (*meta*-CH of Mes), 129.1 (*ortho*-CH of phenyl ring), 128.5 (*meta*-CH of Mes overlapped with *meta*-CH of phenyl ring), 128.2 (*para*-CH of phenyl ring), 123.7 (Im-C5), 121.2 (Im-C4), 83.5 (=CH of COD), 83.1 (=CH of COD), 55.2 (CH<sub>2</sub>), 52.6 (=CH of COD), 51.5 (=CH of COD), 34.5 (CH<sub>2</sub> of COD), 33.0 (CH<sub>2</sub> of COD), 29.7 (CH<sub>2</sub> of COD), 29.1 (CH<sub>2</sub> of COD), 21.2 (*para*-CH<sub>3</sub> of Mes), 19.6 (*ortho*-CH<sub>3</sub> of Mes), 18.0 (*ortho*-CH<sub>3</sub> of Mes) ppm.

HRMS (ESI<sup>+</sup>, MeOH): *m/z* (%): (100 %) [M-Cl]<sup>+</sup> = [C<sub>27</sub>H<sub>32</sub>IrN<sub>2</sub>]<sup>+</sup> = 577.2187 (Calculated [M-Cl]<sup>+</sup> = 577.2189) amu. Elemental Analysis: Found C, 52.75; H, 4.55, N, 4.43; Calculated for C<sub>27</sub>H<sub>32</sub>ClIrN<sub>2</sub>: C, 52.97; H, 5.27; N, 4.58%.

#### [Ir(MesIEtPh)CODCl] (1e)

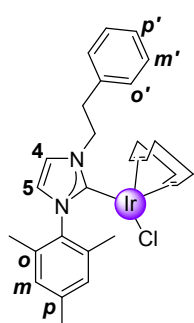

4.BPh<sub>4</sub> (107 mg, 0.176 mmol) was dissolved partially in acetone (20 mL). K<sub>2</sub>CO<sub>3</sub> (127 mg, 0.0917 mmol) was added and the suspension was stirred for 15 minutes at room temperature prior to the addition of [Ir(COD)Cl]<sub>2</sub> (59.0 mg, 0.0878 mmol). The bright yellow mixture was heated at reflux for 4 hours, at which point the mixture looks orange-yellow in colour. After cooling to room temperature, the mixture was filtered through celite and evaporated to give an orange-yellow residue. The residue was redissolved in dichloromethane (20 mL), whereby white solid precipitates out. The mixture was filtered through celite and the solvent was evaporated to give an orange-yellow solid. The solid was then redissolved in hexane (30 mL) and heated with stirring in a water bath at about 40 °C for about 15 minutes. The yellow solution was filtered and collected. This two steps were repeated twice more until a small amount of brown solid is remains undissolved. All the collected yellow solution were

combined and reduced in volume to *ca.* 10 mL. The solution was cooled in the freezer overnight to give **1e** as yellow needle-like crystals.

Yield: 79.4 mg, 0.183 mmol, 72%

$^1\text{H}$  NMR ( $\text{CD}_2\text{Cl}_2$ , 600 MHz, 298K):  $\delta$  7.28 (m, 5H, *ortho*-CH, *meta*-CH and *para*-CH of benzene ring), 7.03 (s, 1H, *meta*-CH of Mes), 6.94 (d,  $^3J_{\text{H-H}} = 1.92$  Hz, 1H, Im-H4), 6.92 (s, 1H, *meta*-CH of Mes), 6.74 (d,  $^3J_{\text{H-H}} = 1.92$  Hz, 1H, Im-H5), 5.13 (dt,  $^2J_{\text{H-H}} = 13.5$  Hz,  $^3J_{\text{H-H}} = 7.68$  Hz, 1H, ImN-CH<sub>2</sub>), 4.46 (dt,  $^2J_{\text{H-H}} = 13.5$  Hz,  $^3J_{\text{H-H}} = 7.68$  Hz, 1H, ImN-CH<sub>2</sub>), 4.38 (dt,  $^3J_{\text{H-H}} = 11.6$  Hz,  $^3J_{\text{H-H}} = 3.56$  Hz, 1H, =CH of COD), 4.29 (dt,  $^3J_{\text{H-H}} = 11.6$  Hz,  $^3J_{\text{H-H}} = 3.56$  Hz, 1H, =CH of COD), 3.30 (t,  $^3J_{\text{H-H}} = 7.40$  Hz, 2H, Ar-CH<sub>2</sub>), 2.79 (dt,  $^3J_{\text{H-H}} = 11.6$  Hz,  $^3J_{\text{H-H}} = 3.56$  Hz, 1H, =CH of COD), 2.68 (dt,  $^3J_{\text{H-H}} = 11.6$  Hz,  $^3J_{\text{H-H}} = 3.56$  Hz, 1H, =CH of COD), 2.35 (s, 3H, *para*-CH<sub>3</sub>), 2.28 (s, 3H, *ortho*-CH<sub>3</sub>), 2.05 (m, 2H, CH<sub>2</sub> of COD), 1.87 (s, 3H, *ortho*-CH<sub>3</sub>), 1.76 (m, 1H, CH<sub>2</sub> of COD), 1.48 (m, 3H, CH<sub>2</sub> of COD), 1.36 (m, 1H, CH<sub>2</sub> of COD), 1.18 (m, 1H, CH<sub>2</sub> of COD) ppm.

$^{13}\text{C}\{^1\text{H}\}$  NMR ( $\text{CD}_2\text{Cl}_2$ , 150 MHz, 298K):  $\delta$  180.1 (Im-C2), 139.1 (*para*-CCH<sub>3</sub> of Mes), 139.0 (C<sub>q</sub> of phenyl ring), 137.0 (*ortho*-CCH<sub>3</sub> of Mes), 136.4 (C<sub>q</sub> of Mes), 135.0 (*ortho*-CCH<sub>3</sub> of Mes), 129.6 (*meta*-CH of Mes), 129.4 (*meta*-CH of phenyl ring), 129.0 (*ortho*-CH of phenyl ring), 128.4 (*meta*-CH of Mes), 127.0 (*para*-CH of phenyl ring), 123.2 (Im-C5), 121.1 (Im-C4), 83.2 (=CH of COD), 82.7 (=CH of COD), 53.1 (ImN-CH<sub>2</sub>), 52.2 (=CH of COD), 51.7 (=CH of COD), 37.5 (Ar-CH<sub>2</sub>), 34.6 (CH<sub>2</sub> of COD), 33.1 (CH<sub>2</sub> of COD), 29.6 (CH<sub>2</sub> of COD), 29.3 (CH<sub>2</sub> of COD), 21.2 (*para*-CH<sub>3</sub> of Mes), 19.6 (*ortho*-CH<sub>3</sub> of Mes), 17.9 (*ortho*-CH<sub>3</sub> of Mes) ppm.

HRMS (ESI<sup>+</sup>, MeOH): *m/z* (%): (100 %)  $[\text{M}-\text{Cl}]^+ = [\text{C}_{28}\text{H}_{34}\text{IrN}_2]^+ = 591.2347$  (Calculated  $[\text{M}-\text{Cl}]^+ = 591.2346$ ) amu. Elemental Analysis: Found C, 50.94; H, 5.55, N, 3.78; Calculated for  $\text{C}_{28}\text{H}_{34}\text{ClIrN}_2 \cdot 0.5\text{CH}_2\text{Cl}_2$ : C, 51.19; H, 5.28; N, 4.19%.

## **Characterisation of active complexes in the presence of pyridine**

### **$[\text{Ir}(\text{PhIme})(\text{py})_3(\text{H})_2]\text{Cl}$ (**2b**)**

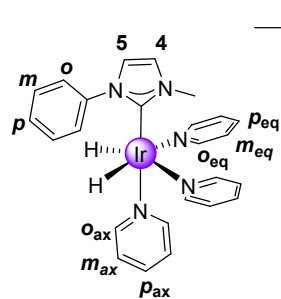

$[\text{Ir}(\text{PhIme})(\text{COD})\text{Cl}]$  (**1b**) (1.5 mg, 3.1  $\mu\text{mol}$ ) was dissolved in methanol-*d*<sub>4</sub> (0.6 mL) in a Young's tap NMR tube. Pyridine (1.3  $\mu\text{L}$ , 0.016 mmol) was then added to the bright yellow mixture. The

mixture was degassed using three cycles of freeze-pump-thaw. *Parahydrogen* was added at a pressure of 3 bar and the sample was shaken to dissolve the hydrogen into solution. The bright yellow mixture turns very pale yellow in colour.

$^1\text{H}$  NMR ( $\text{CD}_3\text{OD}$ , 400 MHz, 298K):  $\delta$  8.45 (d,  $^3J_{\text{H-H}} = 6.23$  Hz, 4H, *ortho-CH*, py *trans* to hydride), 7.85 (tt,  $J_{\text{H-H}} = 7.78$  Hz, 1.77 Hz, 2H, *para-CH*, py *trans* to hydride), 7.66 (d,  $^3J_{\text{H-H}} = 2.17$  Hz, 1H, Im-**H4/5**), 7.36 (apparent t,  $J_{\text{H-H}} = 7.16$  Hz, 4H, *meta-CH*, py *trans* to hydride), 7.15 (d,  $^3J_{\text{H-H}} = 2.17$  Hz, 1H, Im-**H4/5**), 7.10 (dd,  $J_{\text{H-H}} = 7.57$  Hz, 1.18 Hz, 1H, *para-CH* of Ph), 6.88 (m, 2H, *ortho-CH* of Ph), 6.83 (q, 2H, *meta-CH* of Ph), 3.45 (s, 3H,  $\text{CH}_3$ ), -22.14 (s, 2H, hydrides) ppm.

$^{13}\text{C}\{^1\text{H}\}$  NMR ( $\text{CD}_3\text{OD}$ , 100 MHz, 298K):  $\delta$  153.8 (*ortho-CH*, py *trans* to hydride), 138.1 (*para-CH*, py *trans* to hydride), 127.1 (*meta-CH*, py *trans* to hydride), 125.4 (*meta-CH* of Ph), 123.22 (Im-C4/5), 122.8 (*ortho-CH* of Ph), 115.7 (Im-C4/5), 111.1 (*para-CH* of Ph), 27.5 ( $\text{CH}_3$ ) ppm.

### $[\text{Ir}(\text{MesIme})(\text{py})_3(\text{H})_2]\text{Cl}$ (**2c**)

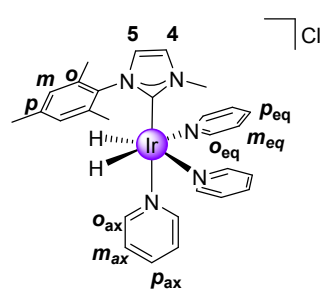

$[\text{Ir}(\text{MesIme})(\text{COD})\text{Cl}]$  (**1c**) (2.8 mg, 0.0031 mmol) was dissolved in methanol- $d_4$  (0.6 mL) in a Young's tap NMR tube. Pyridine (1.3  $\mu\text{L}$ , 0.016 mmol) was then added to the bright yellow mixture. The mixture was degassed using three cycles of freeze-pump-thaw. *Parahydrogen* was added at a pressure of 3 bar and the sample was shaken to dissolve the hydrogen into solution. The bright yellow

mixture turns colourless.

$^1\text{H}$  NMR ( $\text{CD}_3\text{OD}$ , 400 MHz, 298K):  $\delta$  8.38 (d,  $^3J_{\text{H-H}} = 4.69$  Hz, 4H, *ortho-CH*, py *trans* to hydride), 8.26 (d,  $^3J_{\text{H-H}} = 4.69$  Hz, 2H, *ortho-CH*, py *cis* to hydride), 7.87 (tt,  $J_{\text{H-H}} = 8.48$  Hz, 1.50 Hz, 2H, *para-CH*, py *trans* to hydride), 7.80 (tt,  $J_{\text{H-H}} = 7.64$  Hz, 1.50 Hz, 1H, *para-CH*, py *cis* to hydride), 7.28 (d,  $^3J_{\text{H-H}} = 2.05$  Hz, 1H, Im-**H4/5**), 7.27 (m, 4H, *meta-CH*, py *trans* to hydride), 7.13 (m, 4H, *meta-CH*, py *cis* to hydride), 6.91 (d,  $^3J_{\text{H-H}} = 2.05$  Hz, 1H, Im-**H4/5**),

6.65 (s, 2H, *meta*-CH of Mes), 3.11 (s, 3H, CH<sub>3</sub>), 2.21 (s, 3H, *para*-CH<sub>3</sub> of Mes), 1.99 (s, 6H, *ortho*-CH<sub>3</sub> of Mes), -22.34 (s, 2H, hydrides) ppm.

<sup>13</sup>C{<sup>1</sup>H} NMR (CD<sub>3</sub>OD, 100 MHz, 298K): δ 155.5 (*ortho*-CH, py *cis* to hydride), 153.8 (*ortho*-CH, py *trans* to hydride), 138.3 (*para*-CCH<sub>3</sub> of Mes), 137.3 (*ortho*-CCH<sub>3</sub> of Mes), 136.5 (*para*-CH, py *cis* to hydride), 136.3 (*para*-CH, py *trans* to hydride), 135.7 (C<sub>q</sub> of Mes), 128.5 (2C, *meta*-CH of Mes), 125.9 (*meta*-CH of py *trans* to hydrides), 125.5 (*meta*-CH of py *cis* to hydrides), 122.5 (Im-C4/5), 122.02 (Im-C4/5), 36.9 (CH<sub>3</sub>), 19.6 (*para*-CH<sub>3</sub> of Mes), 17.4 (2C, *ortho*-CH<sub>3</sub> of Mes) ppm.

[Ir(MesIBn)(py)<sub>3</sub>(H)<sub>2</sub>](Cl) (2d)

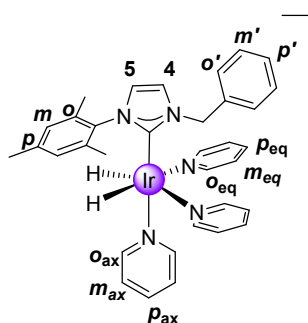

[Ir(MesIBn)(COD)Cl] (**1d**) (1.6 mg, 0.0026 mmol) was dissolved in methanol-*d*<sub>4</sub> (0.6 mL) in a Young's tap NMR tube. Pyridine (1.3 μL, 0.016 mmol) was then added to the bright yellow mixture. The mixture was degassed using three cycles of freeze-pump-thaw. Parahydrogen was added at a pressure of 3 bar and the sample was shaken to dissolve the hydrogen into solution. The bright yellow mixture turns colourless.

<sup>1</sup>H NMR (CD<sub>3</sub>OD, 400 MHz, 298K): δ 8.36 (d, <sup>3</sup>J<sub>H-H</sub> = 4.59 Hz, 4H, *ortho*-CH, py *trans* to hydride), 8.22 (d, <sup>3</sup>J<sub>H-H</sub> = 5.09 Hz, 2H, *ortho*-CH, py *cis* to hydride), 7.83 (tt, J<sub>H-H</sub> = 7.71 Hz, 1.48 Hz, 2H, *para*-CH, py *trans* to hydride), 7.78 (tt, J<sub>H-H</sub> = 7.69 Hz, 1.50 Hz, 1H, *para*-CH, py *cis* to hydride), 7.25 (apparent t, J<sub>H-H</sub> = 6.87 Hz, 3H, *meta*- and *para*-CH of Bn), 7.22 (m, 4H, *meta*-CH, py *trans* to hydride), 7.11 (m, 4H, *meta*-CH, py *cis* to hydride), 7.06 (d, <sup>3</sup>J<sub>H-H</sub> = 1.93 Hz, 1H, Im-H4/5), 7.05 (d, <sup>3</sup>J<sub>H-H</sub> = 7.74, 2H, *ortho*-CH of Bn), 6.95 (d, <sup>3</sup>J<sub>H-H</sub> = 2.04 Hz, 1H, Im-H4/5), 6.67 (s, 2H, *meta*-CH of Mes), 4.89 (s, 2H, CH<sub>2</sub>), 2.22 (s, 3H, *para*-CH<sub>3</sub> of Mes), 2.05 (s, 6H, *ortho*-CH<sub>3</sub> of Mes), -22.24 (s, 2H, hydrides) ppm.

<sup>13</sup>C{<sup>1</sup>H} NMR (CD<sub>3</sub>OD, 100 MHz, 298K): δ 155.2 (*ortho*-CH, py *cis* to hydride), 153.8 (*ortho*-CH, py *trans* to hydride), and C<sub>q</sub> of Bn find), 138.4 (*para*-CCH<sub>3</sub> of Mes), 136.9 (*ortho*-CCH<sub>3</sub> of Mes), 136.52 (*para*-CH, py *cis* to hydride), 136.34 (*para*-CH, py *trans* to hydride), 135.2 (C<sub>q</sub> of Mes) 128.5 (2C, *meta*-CH of Mes), *meta*- and *para*-CH of Bn), 126.6 (*ortho*-CH of Bn), 125.8 (*meta*-CH of py *trans* to hydrides) 125.5 (*meta*-CH of py *cis* to hydrides), 122.7 (Im-C4/5), 121.0 (Im-C4/5), 52.9 (CH<sub>2</sub>), 19.5 (*para*-CH<sub>3</sub> of Mes), 17.4 (2C, *ortho*-CH<sub>3</sub> of Mes) ppm.

### [Ir(MesIEtPh)(py)<sub>3</sub>(H)<sub>2</sub>]Cl (**2e**)

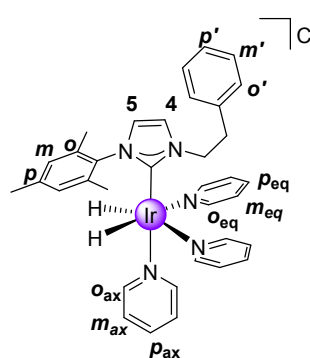

[Ir(MesIEtPh)(COD)Cl] (**1e**) (0.75 mg, 0.0012 mmol) was partially dissolved in methanol-*d*<sub>4</sub> (0.6 mL) in a Young's tap NMR tube. Pyridine (1.3  $\mu$ L, 0.016 mmol) was then added to the yellow mixture. The mixture was heated in a water bath at 40 °C for 15 minutes to help dissolve the undissolved yellow solid. The mixture was degassed using three cycles of freeze-pump-thaw. Parahydrogen was added at a pressure of 3 bar and the sample was shaken to dissolve the hydrogen into solution. The bright yellow mixture turns colourless.

<sup>1</sup>H NMR (CD<sub>3</sub>OD, 400 MHz, 298K):  $\delta$  8.34 (d, <sup>3</sup>*J*<sub>H-H</sub> = 5.03 Hz, 4H, *ortho*-CH, py *trans* to hydride), 8.25 (d, <sup>3</sup>*J*<sub>H-H</sub> = 5.09 Hz, 2H, *ortho*-CH, py *cis* to hydride), 7.83 (tt, *J*<sub>H-H</sub> = 7.74 Hz, 1.60 Hz, 2H, *para*-CH, py *trans* to hydride), 7.80 (tt, *J*<sub>H-H</sub> = 7.62 Hz, 1.40 Hz, 1H, *para*-CH, py *cis* to hydride), 7.28 (d, <sup>3</sup>*J*<sub>H-H</sub> = 1.83 Hz, 1H, Im-H4/5), 7.23 (m, 4H, *meta*-CH, py *trans* to hydride), 7.21 (m, 3H, *meta*- and *para*-CH of Bn), 7.13 (apparent t, *J*<sub>H-H</sub> = 6.98 Hz, 4H, *meta*-CH, py *cis* to hydride), 7.03 (d, <sup>3</sup>*J*<sub>H-H</sub> = 6.82, 2H, *ortho*-CH of Bn), 6.88 (d, <sup>3</sup>*J*<sub>H-H</sub> = 1.83 Hz, 1H, Im-H4/5), 6.63 (s, 2H, *meta*-CH of Mes), 3.72 (t, <sup>3</sup>*J*<sub>H-H</sub> = 7.92 Hz, 2H, Im-CH<sub>2</sub>), 2.95 (t, <sup>3</sup>*J*<sub>H-H</sub> = 7.99 Hz, 2H, Ph-CH<sub>2</sub>), 2.20 (s, 3H, *para*-CH<sub>3</sub> of Mes), 1.99 (s, 6H, *ortho*-CH<sub>3</sub> of Mes), -22.31 (s, 2H, hydrides) ppm.

<sup>13</sup>C{<sup>1</sup>H} NMR (CD<sub>3</sub>OD, 125 MHz, 298K):  $\delta$  155.6 (*ortho*-CH, py *cis* to hydride), 153.7 (*ortho*-CH, py *trans* to hydride), 138.4 (*para*-CCH<sub>3</sub> of Mes), 137.9 (C<sub>q</sub> of Ph), 137.5 (*ortho*-CCH<sub>3</sub> of Mes), 136.9 (*para*-CH, py *cis* to hydride), 136.5 (*para*-CH, py *trans* to hydride), 135.1 (C<sub>q</sub> of Mes), 128.5 (2C, *meta*-CH of Mes), 128.3 (*ortho*-CH of Ph), 128.1 (*meta*-CH of Ph), 126.2 (*para*-CH of Ph), 125.8 (*meta*-CH of py *trans* to hydrides), 125.5 (*meta*-CH of py *cis* to hydrides), 122.2 (Im-C4/5), 120.8 (Im-C4/5), 51.3 (Im-CH<sub>2</sub>), 35.6 (Ph-CH<sub>2</sub>), 19.5 (*para*-CH<sub>3</sub> of Mes), 17.5 (2C, *ortho*-CH<sub>3</sub> of Mes) ppm.

### Characterisation of the active complex formed in the presence of 3,4-lutidine

#### [Ir(PhIMe)(3,4-lutidine)<sub>3</sub>(H)<sub>2</sub>]Cl (**3b**)

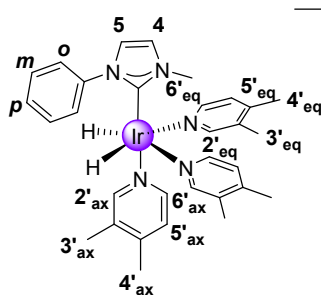

$\text{[Ir(PhIme)(COD)Cl]}$  (**1b**) (1.5 mg, 3.1  $\mu\text{mol}$ ) was dissolved in methanol- $d_4$  (0.6 mL) in a Young's tap NMR tube. 3,4-Lutidine (1.8  $\mu\text{L}$ , 0.016 mmol) was then added to the bright yellow mixture. The mixture was degassed using three cycles of freeze-pump-thaw. Parahydrogen was added at a pressure of 3 bar and the sample was shaken to dissolve the hydrogen into solution.

The bright yellow mixture turns colourless

$^1\text{H}$  NMR (400 MHz,  $\text{CD}_3\text{OD}$ ):  $\delta$  8.39 (s, 1H, **H2'** of 3,4-lutidine *cis* to hydride (axial position)), 8.13 (d,  $^3J_{\text{H-H}} = 5.5$  Hz, 2H, **H6'** of 3,4-lutidine *trans* to hydride (equatorial position)), 8.07 (s, 1H, **H2'** of 3,4-lutidine *trans* to hydride (equatorial position)), 7.65 (d,  $^3J_{\text{H4-H5}} = 2.5$  Hz, 1H, Im-**H4**), 7.18 (d,  $^3J_{\text{H-H}} = 5.5$  Hz, 1H, **H6'** of 3,4-lutidine *cis* to hydride (axial position)), 7.15 (d,  $^3J_{\text{H4-H5}} = 2.5$  Hz, 1H, Im-**H5**), 7.13 (d,  $^3J_{\text{H-H}} = 5.2$  Hz, 2H, **H5'** of 3,4-lutidine *trans* to hydride (equatorial position)), 7.10 (d,  $^3J_{\text{H-H}} = 5.6$  Hz, 1H, **H5'** of 3,4-lutidine *cis* to hydride (axial position)), 6.87 (m, 3H, *o*- and *m*-CH of Ph), 6.81 (apparent t,  $^3J_{\text{H-H}} = 7.0$  Hz, 2H, *p*-CH of Ph), 3.46 (s, 3H, ImN-CH<sub>3</sub>), -22.01 (s, 2H, hydrides) ppm.

#### $[\text{Ir}(\text{MesIme})(3,4\text{-lutidine})_3(\text{H})_2]\text{Cl}$ (**3c**)

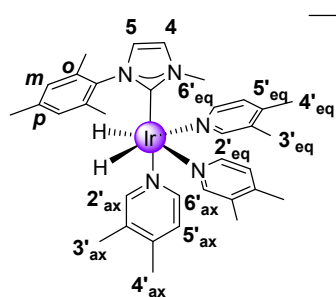

$\text{[Ir(MesIme)(COD)Cl]}$  (**1c**) (2.8 mg, 0.0052 mmol) was dissolved in methanol- $d_4$  (0.6 mL) in a Young's tap NMR tube. 3,4-Lutidine (1.7  $\mu\text{L}$ , 0.015 mmol) was then added to the bright yellow mixture. The mixture was degassed using three cycles of freeze-pump-thaw. Parahydrogen was added at a pressure of 3 bar and the sample was shaken to dissolve the

hydrogen into solution. The bright yellow mixture turns colourless.

$^1\text{H}$  NMR ( $\text{CD}_3\text{OD}$ , 500 MHz, 298K):  $\delta$  8.12 (s, 1H, **H2'** of 3,4-lutidine *cis* to hydride), 8.04 (d,  $^3J_{\text{H-H}} = 5.42$  Hz, 2H, **H6'** of 3,4-lutidine *trans* to hydride), 8.00 (s, 1H, **H2'** of 3,4-lutidine *trans* to hydride), 7.72 (d,  $^3J_{\text{H-H}} = 5.56$  Hz, 1H, **H6'** of 3,4-lutidine *cis* to hydride), 7.25 (d,  $^3J_{\text{H-H}} = 1.85$  Hz, 1H, Im-**H4/5**), 7.05 (d,  $^3J_{\text{H-H}} = 5.55$  Hz, 2H, **H5'** of 3,4-lutidine *trans* to hydride), 6.87 (d,  $^3J_{\text{H-H}} = 5.78$  Hz, 1H, **H5'** of 3,4-lutidine *cis* to hydride), 6.83 (d,  $^3J_{\text{H-H}} = 1.39$  Hz, 1H, Im-**H4/5**), 6.65 (s, 2H, *meta*-CH of Mes), 3.13 (s, 3H, Im-CH<sub>3</sub>), 2.28 (s, 6H,

CH<sub>3</sub>-4' of 3,4-lutidine *trans* to hydride), 2.21 (s, 3H, *para*-CH<sub>3</sub> of Mes), 2.19 (s, 3H, CH<sub>3</sub>-4' of 3,4-lutidine *cis* to hydride), 2.09 (s, 6H, CH<sub>3</sub>-3' of 3,4-lutidine *trans* to hydride), 2.07 (s, 3H, CH<sub>3</sub>-3' of 3,4-lutidine *cis* to hydride), 1.98 (s, 6H, *ortho*-CH<sub>3</sub> of Mes), -22.36 (s, 2H, hydrides) ppm.

[Ir(MesIBn)(3,4-lutidine)<sub>3</sub>(H)<sub>2</sub>]Cl (**3d**)

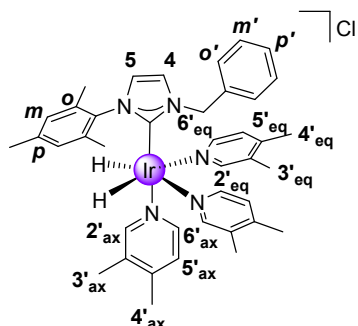

[Ir(MesIBn)(COD)Cl] (**1d**) (1.8 mg, 0.0031 mmol) was dissolved in methanol-*d*<sub>4</sub> (0.6 mL) in a Young's tap NMR tube. 3,4-Lutidine (1.7 μL, 0.015 mmol) was then added to the bright yellow mixture. The mixture was degassed using three cycles of freeze-pump-thaw. Parahydrogen was added at a pressure of 3 bar and the sample was shaken to dissolve the hydrogen into solution. The bright yellow mixture turns colourless.

<sup>1</sup>H NMR (CD<sub>3</sub>OD, 400 MHz, 298K): δ 8.07 (s, 1H, H2' of 3,4-lutidine *cis* to hydride), 8.05 (d, <sup>3</sup>J<sub>H-H</sub> = 5.55 Hz, 2H, H6' of 3,4-lutidine *trans* to hydride), 8.00 (s, 1H, H2' of 3,4-lutidine *trans* to hydride), 7.23 (m, 3H, *meta*- and *para*-CH of Bn), 7.13 (d, <sup>3</sup>J<sub>H-H</sub> = 1.62 Hz, 1H, Im-H4/5), 6.99 (apparent d, <sup>3</sup>J<sub>H-H</sub> = 5.68 Hz, 4H, H5' of 3,4-lutidine *trans* to hydride overlapped with , *ortho*-CH of Bn), 6.91 (d, <sup>3</sup>J<sub>H-H</sub> = 1.62 Hz, 1H, Im-H4/5), 6.84 (d, <sup>3</sup>J<sub>H-H</sub> = 5.68 Hz, 1H, H5' of 3,4-lutidine *cis* to hydride), 6.70 (s, 2H, *meta*-CH of Mes), 4.97 (s, 2H, Im-CH<sub>2</sub>), 2.24 (s, 6H, CH<sub>3</sub>-4' of 3,4-lutidine *trans* to hydride), 2.23 (s, 3H, *para*-CH<sub>3</sub> of Mes), 2.17 (s, 3H, CH<sub>3</sub>-4' of 3,4-lutidine *cis* to hydride), 2.06 (s, 6H, CH<sub>3</sub>-3' of 3,4-lutidine *trans* to hydride), 2.05 (s, 6H, *ortho*-CH<sub>3</sub> of Mes), 2.04 (s, 3H, CH<sub>3</sub>-3' of 3,4-lutidine *cis* to hydride), -22.30 (s, 2H, hydrides) ppm.

[Ir(MesIEtPh)(3,4-lutidine)<sub>3</sub>(H)<sub>2</sub>]Cl (**3e**)

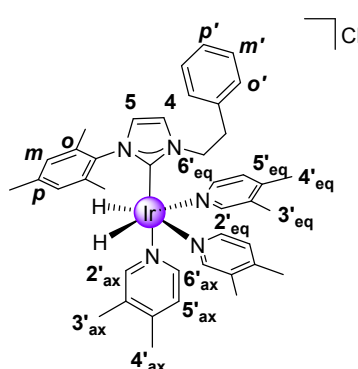

[Ir(MesIEtPh)(COD)Cl] (**1e**) (1.6 mg, 0.0026 mmol) was partially dissolved in methanol-*d*<sub>4</sub> (0.6 mL) in a Young's tap NMR tube. 3,4-Lutidine (1.7 μL, 0.015 mmol) was then added to the yellow mixture. The mixture was heated in a water bath at 40 °C for 15 minutes to help dissolve the undissolved yellow

solid. The mixture was degassed using three cycles of freeze-pump-thaw. *Parahydrogen* was added at a pressure of 3 bar and the sample was shaken to dissolve the hydrogen into solution. The bright yellow mixture turns colourless.

$^1\text{H}$  NMR ( $\text{CD}_3\text{OD}$ , 500 MHz, 298K):  $\delta$  8.12 (s, 1H, **H2'** of 3,4-lutidine *cis* to hydride), 8.05 (d,  $^3J_{\text{H-H}} = 5.67$  Hz, 2H, **H6'** of 3,4-lutidine *trans* to hydride), 8.00 (s, 1H, **H2'** of 3,4-lutidine *trans* to hydride), 7.71 (d,  $^3J_{\text{H-H}} = 5.53$  Hz, 1H, **H6'** of 3,4-lutidine *cis* to hydride), 7.26 (d,  $^3J_{\text{H-H}} = 1.18$  Hz, 1H, Im-**H4/5**), 7.20 (m, 3H, *meta*- and *para*-**CH** of Ph), 7.03 (d,  $^3J_{\text{H-H}} = 5.45$  Hz, 2H, **H5'** of 3,4-lutidine *trans* to hydride), 7.00 (d,  $^3J_{\text{H-H}} = 7.35$  Hz, 2H, *ortho*-**CH** of Bn), 6.87 (d,  $^3J_{\text{H-H}} = 5.61$  Hz, 1H, **H5'** of 3,4-lutidine *cis* to hydride), 6.83 (d,  $^3J_{\text{H-H}} = 1.10$  Hz, 1H, Im-**H4/5**), 6.65 (s, 2H, *meta*-**CH** of Mes), 3.75 (apparent t,  $^3J_{\text{H-H}} = 8.07$  Hz, 2H, Im-**CH**<sub>2</sub>), 2.92 (apparent t,  $^3J_{\text{H-H}} = 8.07$  Hz, 2H, Im-**CH**<sub>2</sub>), 2.25 (s, 6H, **CH**<sub>3</sub>-3' of 3,4-lutidine *trans* to hydride), 2.21 (s, 3H, *para*-**CH**<sub>3</sub> of Mes), 2.19 (s, 3H, **CH**<sub>3</sub>-3' of 3,4-lutidine *cis* to hydride), 2.07 (s, 3H, **CH**<sub>3</sub>-4' of 3,4-lutidine *cis* to hydride), 2.06 (s, 6H, **CH**<sub>3</sub>-4' of 3,4-lutidine *trans* to hydride), 1.99 (s, 6H, *ortho*-**CH**<sub>3</sub> of Mes), -22.36 (s, 2H, hydrides) ppm.

#### [Ir(IMes)(3,4-lutidine)<sub>3</sub>(H)<sub>2</sub>][Cl] (**3a**)

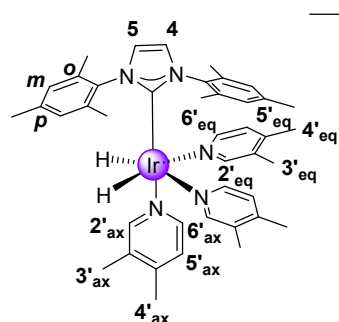

$\text{[Ir(IMes)(COD)Cl]}$  (**1a**) (2.5 mg, 0.0026 mmol) was partially dissolved in methanol-*d*<sub>4</sub> (0.6 mL) in a Young's tap NMR tube. 3,4-Lutidine (1.7  $\mu\text{L}$ , 0.015 mmol) was then added to the yellow mixture. The mixture was heated in a water bath at 40  $^{\circ}\text{C}$  for 15 minutes to help dissolve the undissolved yellow solid. The mixture was degassed using three cycles of freeze-

pump-thaw. *Parahydrogen* was added at a pressure of 3 bar and the sample was shaken to dissolve the hydrogen into solution. The bright yellow mixture turns colourless.

$^1\text{H}$  NMR ( $\text{CD}_3\text{OD}$ , 500 MHz, 298K):  $\delta$  8.06 (br s, 1H, **H2'** of 3,4-lutidine *cis* to hydride), 7.96 (br s, 2H, **H6'** of 3,4-lutidine *trans* to hydride), 7.91 (br s, 1H, **H2'** of 3,4-lutidine *trans* to hydride), 7.51 (d,  $^3J_{\text{H-H}} = 4.14$  Hz, 1H, **H6'** of 3,4-lutidine *cis* to hydride), 7.01 (s, 2H, Im-**H4** and Im-**H5**), 6.91 (br s, 2H, **H5'** of 3,4-lutidine *trans* to hydride), 6.67 (br s, 5H, *meta*-**CH** of Mes overlapped with **H5'** of 3,4-lutidine *cis* to hydride), 2.25 (s, 3H, **CH**<sub>3</sub>-4' of 3,4-lutidine *trans* to hydride), 2.20 (s, 6H, *para*-**CH**<sub>3</sub> of Mes), 2.08 (s, 3H, **CH**<sub>3</sub>-4' of 3,4-lutidine

*cis* to hydride), 2.05 (s, 3H, CH<sub>3</sub>-3' of 3,4-lutidine *trans* to hydride), 2.03 (s, 12H, *ortho*-CH<sub>3</sub> of Mes), 1.96 (s, 3H, CH<sub>3</sub>-3' of 3,4-lutidine *cis* to hydride), -22.82 (s, 2H, hydrides) ppm.

## Characterisation of the active complex formed in the presence of 3,5-lutidine

### [Ir(PhIme)(3,5-lutidine)<sub>3</sub>(H)<sub>2</sub>]Cl (4b)

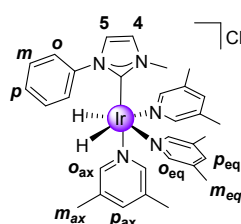

Catalytic reaction quantities: [Ir(PhIme)(COD)Cl] (**1b**) (1.3 mg, 2.6 μmol) and 3,5-lutidine (1.7 μL, 0.015 mmol) in methanol-*d*<sub>4</sub> (0.6 mL).

<sup>1</sup>H NMR (CD<sub>3</sub>OD, 400MHz, 298K): δ 8.03 (s, 4H, *o*-CH of 3,5-lutidine *trans* to hydrides (equatorial position)), 7.66 (d, <sup>3</sup>J<sub>H4+H5</sub> = 2.0 Hz, 1H, Im-H4), 7.64 ((s, 2H, *p*-CH of 3,5-lutidine *cis* to hydrides (axial position)), 7.54 (s, 2H, *p*-CH *trans* to 3,5-lutidine (equatorial position)), 7.16 (d, <sup>3</sup>J<sub>H4+H5</sub>=2.0 Hz, 1H, Im-H5), 7.10 (d, <sup>3</sup>J<sub>H-H</sub>=7.35 Hz, 1H *p*-CH of Ph), 6.83 (m, 4H, *o*- and *m*-CH of Ph), 6.82 (s, H, *p*-CH of 3,5-lutidine *cis* to hydrides (axial position)), 3.46 (s, 3H, -NCH<sub>3</sub>), 2.29 (s, 12H, *m*-CH<sub>3</sub> of 3,5-lutidine *trans* to hydrides (equatorial position)), 2.20 (s, 6H, *m*-CH<sub>3</sub> of 3,5-lutidine *cis* to hydrides (axial position)), -22.24 (s, 2H, hydrides) ppm. <sup>13</sup>C{<sup>1</sup>H} NMR (500 MHz, CD<sub>3</sub>OD, 303 K): δ 154.9 (Im-C2), 149.3 (*o*-CH of 3,5-lutidine *trans* to hydrides (equatorial position)), 148.4 (*ipso*-C<sub>q</sub> of Ph), 148.3 (*p*-CH of 3,5-lutidine *cis* to hydrides (axial position)), 138.6 (*o*- and *m*-CH of Ph), 137.9 (*p*-CH of 3,5-lutidine *trans* to hydrides (equatorial position)), 135.9 (*m*-CCH<sub>3</sub> of 3,5-lutidine *cis* to hydrides (axial position)), 135.2 (*m*-CCH<sub>3</sub> of 3,5-lutidine *trans* to hydrides (equatorial position)), 133.0 (*o*-CH of 3,5-lutidine *cis* to hydrides (axial position)), 121.8 (Im-C5), 121.3 (Im-C4), 109.8 (*p*-CH of Ph), 34.6 (ImN-CH<sub>3</sub>), 18.01 (*m*-CH<sub>3</sub> of 3,5-lutidine *trans* to hydrides (equatorial position)), 16.52 (*m*-CH<sub>3</sub> of 3,5-lutidine *cis* to hydrides (axial position)) ppm.

### [Ir(MesImMe)(3,5-lutidine)<sub>3</sub>(H)<sub>2</sub>]Cl (4c)

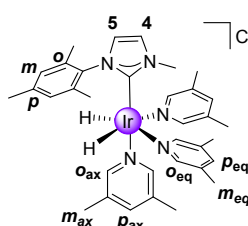

Catalytic reaction quantities: [Ir(MesImMe)(COD)Cl] (**1c**) (1.6 mg, 2.6 μmol) and 3,5-lutidine (1.7 μL, 0.015 mmol) in methanol-*d*<sub>4</sub> (0.6 mL).

$^1\text{H}$  NMR ( $\text{CD}_3\text{OD}$ , 400 MHz, 298K):  $\delta$  7.99 (s, 4H, *o*-CH of 3,5-lutidine *trans* to hydrides (equatorial position)), 7.88 (s, 2H, *o*-CH of 3,5-lutidine *cis* to hydrides (axial position)), 7.56 (s, 2H, *p*-CH of 3,5-lutidine *trans* to hydrides (equatorial position)), 7.49 (s, 1H, *p*-CH of 3,5-lutidine *cis* to hydrides (axial position)), 7.30 (d,  $^3J_{\text{H-H}}=2.0$  Hz, 1H, Im-H4), 6.88 (d,  $^3J_{\text{H-H}}=2.0$  Hz, 1H, Im-H5), 6.69 (s, 2H, *m*-CH of Mes), 3.18 (s, 3H, ImN-CH<sub>3</sub>), 2.23 (s, 6H, *o*-CH<sub>3</sub> of Mes), 2.20 (s, 12H, *m*-CH<sub>3</sub> of 3,5-lutidine *trans* to hydrides (equatorial position)), 2.11 (s, 3H, *p*-CH<sub>3</sub> of Mes), 2.01 (s, 6H, *m*-CH<sub>3</sub> of 3,5-lutidine *cis* to hydrides (axial position)), -22.35 (s, 2H, hydrides) ppm.  $^{13}\text{C}\{^1\text{H}\}$  NMR (500 MHz,  $\text{CD}_3\text{OD}$ , 303 K):  $\delta$  158.9 (Im-C2), 152.7 (*p*-CH of 3,5-lutidine *cis* to hydrides (axial position)), 151.2 (*p*-CH of 3,5-lutidine *trans* to hydrides (equatorial position)), 138.8 (*o*-CH of 3,5-lutidine *trans* to hydrides (equatorial position)), 138.6 (*p*-CCH<sub>3</sub> of Mes), 137.9 (*o*-CH of 3,5-lutidine *cis* to hydrides (axial position)), 137.8 (*o*-CCH of Mes), 136.5 (*ipso*-C<sub>q</sub> of Mes), 135.9 (*m*-CCH<sub>3</sub> of 3,5-lutidine *cis* to hydrides (axial position)), 135.2 (*m*-CCH<sub>3</sub> of 3,5-lutidine *trans* to hydrides (equatorial position)), 128.5 (*m*-CH of Mes), 128.4 (Im-C4), 122.0 (Im-C5), 37.8 (ImN-CH<sub>3</sub>), 37.0 (*p*-CH<sub>3</sub> of Mes), 19.7 (*o*-CH<sub>3</sub> of Mes), 17.2 (*m*-CH<sub>3</sub> of 3,5-lutidine *trans* to hydrides (equatorial position)), 16.7 (*m*-CH<sub>3</sub> of 3,5-lutidine *cis* to hydrides (axial position)) ppm.

[Ir(MesIBn)(3,5-lutidine)<sub>3</sub>(H)<sub>2</sub>]Cl (**4d**)

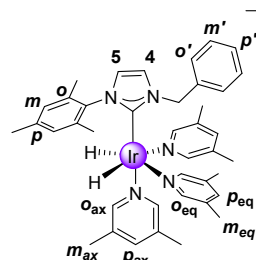

Catalytic reaction quantities: [Ir(MesIBn)(COD)Cl] (**1d**) (1.6 mg, 2.6  $\mu\text{mol}$ ) and 3,5-lutidine (1.7  $\mu\text{L}$ , 0.015 mmol) in methanol-*d*<sub>4</sub> (0.6 mL).

$^1\text{H}$  NMR ( $\text{CD}_3\text{OD}$ , 400 MHz, 298K):  $\delta$  7.99 (s, 4H, *o*-CH of 3,5-lutidine *trans* to hydrides (equatorial position)), 7.82 (s, 2H, *o*-CH of 3,5-lutidine *cis* to hydrides (axial position)), 7.48 (s, 2H, *p*-CH of 3,5-lutidine *trans* to hydrides (equatorial position)), 7.46 (s, 1H, *p*-CH of 3,5-lutidine *cis* to hydrides (axial position)), 7.27 (dt,  $^3J_{\text{H-H}}=8.3$  Hz,  $^3J_{\text{H-H}}=7.2$  Hz 3H, *p*-CH of phenyl ring overlapped with *m*-CH of phenyl ring), 7.04 (d,  $^3J_{\text{H-H}}=5.49$  Hz, 2H, *o*-CH of phenyl ring), 7.17 (s, 1H, Im-H4), 6.94 (s, 1H, Im-H5), 6.73 (s, 2H, *m*-CH of Mes), 5.01 (s, 2H, ImN-CH<sub>2</sub>-), 2.25 (s, 3H, *p*-CH<sub>3</sub> of Mes), 2.16 (s, 6H, *m*-CH<sub>3</sub> of 3,5-lutidine *cis* to hydrides (axial position)), 2.14 (s, 6H, *o*-CH<sub>3</sub> of Mes), 2.07 (s, 12H, *m*-CH<sub>3</sub> of 3,5-lutidine *trans* to hydrides (equatorial position)), -22.28 (s, 2H, hydrides) ppm.  $^{13}\text{C}\{^1\text{H}\}$  NMR (400 MHz,  $\text{CD}_3\text{OD}$ ):  $\delta$  159.9 (Im-C2), 152.5 (*p*-CH of 3,5-lutidine *cis* to hydrides (axial position)), 150.9 (*p*-CH of 3,5-lutidine *trans* to hydrides (equatorial

position)), 145.9 (*ipso*-C<sub>q</sub> of phenyl ring), 138.7 (*p*-CCH<sub>3</sub> of Mes), 138.5 (*o*-CH of 3,5-lutidine *trans* to hydrides (equatorial position)), 137.7 (*o*-CCH<sub>3</sub> of Mes), 135.7 (*m*-CCH<sub>3</sub> of 3,5-lutidine *cis* to hydrides (axial position)), 135.4 (*ipso*-C<sub>q</sub> of Mes), 135.0 (*m*-CCH<sub>3</sub> of 3,5-lutidine *trans* to hydrides (equatorial position)), 134.7 (*o*-CH of 3,5-lutidine *cis* to hydrides (axial position)), 128.3 (*m*-CH of Mes), 127.9 (*m*-CH of phenyl ring), 126.9 (*p*-CH of phenyl ring), 126.3 (*o*-CH of phenyl ring), 122.7 (Im-C4), 121.2 (Im-C5), 52.8 (ImN-CH<sub>2</sub>-), 26.3 (*p*-CH<sub>3</sub> of Mes), 19.9 (*o*-CH<sub>3</sub> of Mes), 16.7 (*m*-CH<sub>3</sub> of 3,5-lutidine *trans* to hydrides (equatorial position)), 16.5 (*m*-CH<sub>3</sub> of 3,5-lutidine *cis* to hydrides (axial position)) ppm.

[Ir(MesIEtPh)(3,5-lutidine)<sub>3</sub>(H)<sub>2</sub>][Cl] (4e)

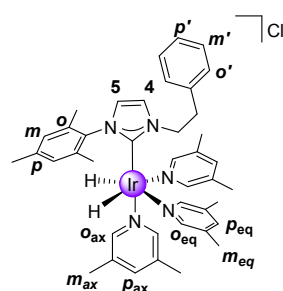

Catalytic reaction quantities: [Ir(MesIEtPh)(COD)Cl] (**1e**) (1.6 mg, 2.6 μmol) and 3,5-lutidine (1.7 μL, 0.015 mmol) in methanol-*d*<sub>4</sub> (0.6 mL). The mixture was heated in a water bath at 40 °C for 15 minutes to help dissolve the undissolved yellow solid before *p*-H<sub>2</sub> was added.

<sup>1</sup>H NMR (CD<sub>3</sub>OD, 500 MHz, 298K): δ 8.00 (s, 4H, *o*-CH of 3,5-lutidine *trans* to hydrides (equatorial position)), 7.88 (s, 2H, *o*-CH lutidine in axial position), 7.51 (s, 2H, *p*-CH of 3,5-lutidine *trans* to hydrides (equatorial position)), 7.47 (s, 1H, *p*-CH of 3,5-lutidine *cis* to hydrides (axial position)), 7.31 (d, <sup>3</sup>*J*<sub>H-H</sub> = 2.0 Hz, 1H, Im-H4), 7.24 (d, <sup>3</sup>*J*<sub>H-H</sub> = 7.2 Hz, 2H, *m*-CH of phenyl ring), 7.19 (d, <sup>3</sup>*J*<sub>H-H</sub> = 7.3 Hz, 1H, *p*-CH of phenyl ring), 7.03 (d, <sup>3</sup>*J*<sub>H-H</sub> = 7.4 Hz, 2H, *o*-CH of phenyl ring), 6.88 (d, <sup>3</sup>*J*<sub>H-H</sub> = 2.0 Hz, 1H, Im-H5), 6.69 (s, 2H, *m*-CH of Mes), 3.76 (t, <sup>3</sup>*J*<sub>H-H</sub> = 7.8 Hz, 2H, ImN-CH<sub>2</sub>-), 2.96 (t, <sup>3</sup>*J*<sub>H-H</sub> = 7.8 Hz, 2H, ImN-CH<sub>2</sub>CH<sub>2</sub>-), 2.23 (s, 3H, *p*-CH<sub>3</sub> of Mes), 2.17 (s, 12H, *m*-CH<sub>3</sub> of 3,5-lutidine *trans* to hydride (equatorial position)), 2.11 (s, 6H, *m*-CH<sub>3</sub> of 3,5-lutidine *cis* to hydrides (axial position)), 2.02 (s, 6H, *o*-CH<sub>3</sub> of Mes), -22.38 (s, 2H, hydrides) ppm. <sup>13</sup>C{<sup>1</sup>H} NMR (500 MHz, CD<sub>3</sub>OD): δ 158.9 (Im-C2), 152.8 (*p*-CH of 3,5-lutidine *cis* to hydrides (axial position)), 151.1 (*p*-CH of 3,5-lutidine *trans* to hydride (equatorial position)), 138.2 (*p*-CCH<sub>3</sub> of Mes), 138.1 (*ipso*-C<sub>q</sub> of phenyl ring), 137.8 (*o*-CH of 3,5-lutidine *trans* to hydride (equatorial position)), 137.6 (*o*-CCH<sub>3</sub> of Mes), 135.9 (*m*-CCH<sub>3</sub> of 3,5-lutidine *cis* to hydrides (axial position)), 135.3 (*ipso*-C<sub>q</sub> of Mes), 135.2 (*m*-CCH<sub>3</sub> of 3,5-lutidine *trans* to hydride (equatorial position)), 134.9 (*o*-CH of 3,5-lutidine *cis* to hydrides (axial position)), 128.5 (*m*-CH of Mes), 128.3 (*o*-CH of phenyl ring), 128.1 (*m*-CH of phenyl ring), 126.0 (*p*-CH of phenyl ring), 122.2 (Im-C4), 120.5 (Im-C5), 51.8 (ImN-CH<sub>2</sub>-), 35.1 (ImN-CH<sub>2</sub>CH<sub>2</sub>-), 19.9

(*p*-CH<sub>3</sub> of Mes), 17.3 (*o*-CH<sub>3</sub> of Mes), 16.7 (*m*-CH<sub>3</sub> of 3,5-lutidine *trans* to hydride (equatorial position)), 16.5 (*m*-CH<sub>3</sub> of 3,5-lutidine *cis* to hydrides (axial position)) ppm.

#### [Ir(IMes)(3,5-lutidine)<sub>3</sub>(H)<sub>2</sub>]Cl (**4a**)

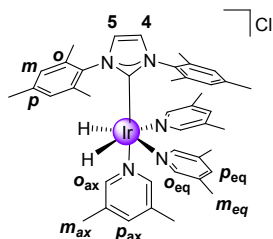

Catalytic reaction quantities: [Ir(IMes)(COD)Cl] (**1a**) (1.7 mg, 2.6 μmol) and 3,5-lutidine (1.7 μL, 0.015 mmol) in methanol-*d*<sub>4</sub> (0.6 mL).

<sup>1</sup>H NMR (CD<sub>3</sub>OD, 500 MHz, 298K): δ 7.99 (s, 4H, *o*-CH of 3,5-lutidine *trans* to hydride (equatorial position)), 7.88 (s, 2H, *o*-CH of 3,5-lutidine *cis* to hydride (axial position)), 7.55 (s, 2H, *p*-CH of 3,5-lutidine *trans* to hydride (equatorial position)), 7.49 (s, H, *p*-CH of 3,5-lutidine *cis* to hydride (axial position)), 7.30 (s, 2H, Im-H4 and Im-H5), 6.93 (s, 4H, *m*-CH of Mes), 2.23 (s, 6H, *p*-CH<sub>3</sub> of Mes), 2.19 (s, 12H, *m*-CH<sub>3</sub> of 3,5-lutidine *trans* to hydride (equatorial position)), 2.10 (s, 12H, *o*-CH<sub>3</sub> of Mes), 2.01 (s, 6H, *m*-CH<sub>3</sub> of 3,5-lutidine *cis* to hydride (axial position)), -22.79 (s, 2H, hydrides). <sup>13</sup>C{<sup>1</sup>H} NMR (500 MHz, CD<sub>3</sub>OD): δ 152.4 (*p*-CH of 3,5-lutidine *cis* to hydride (axial position)), 152.2 (Im-C2), 152.3 (*p*-CH of 3,5-lutidine *trans* to hydride (equatorial position)), 137.5 (*o*-CH of 3,5-lutidine *trans* to hydride (equatorial position)), 135.9 (*m*-CCH<sub>3</sub> of 3,5-lutidine *cis* to hydride (axial position)), 135.2 (*m*-CCH<sub>3</sub> of 3,5-lutidine *trans* to hydride (equatorial position)), 134.9 (*o*-CH of 3,5-lutidine *cis* to hydride (axial position)), 137.9 (*p*-CCH<sub>3</sub> of Mes), 137.7 (*o*-CCH<sub>3</sub> of Mes), 135.3 (*ipso*-C<sub>q</sub> of Mes), 128.2 (*m*-CH of Mes), 122.4 (Im-C4 and Im-C5), 19.7 (*p*-CH<sub>3</sub> of Mes), 17.4 (*o*-CH<sub>3</sub> of Mes), 16.7 (*m*-CH<sub>3</sub> of 3,5-lutidine *trans* to hydride (equatorial position)), 16.1 (*m*-CH<sub>3</sub> of 3,5-lutidine *cis* to hydride (axial position)).

### Ligand exchange rates and proton NMR signal enhancement

Table 1S: Full list of ligand exchange rates and errors at the indicated temperature.

| compl<br>ex | pyridine |          |       | hydride |       |       | 3,4-lutidine  |                |       |
|-------------|----------|----------|-------|---------|-------|-------|---------------|----------------|-------|
|             | 298 K    | 303 K    | 313 K | 298 K   | 303 K | 313 K | 298 K         | 303 K          | 313 K |
| <b>1a</b>   | 13.3±0.4 | 28.5±0.9 | 88±5  |         |       |       | 9.72±0.0<br>4 | 17.10±0.<br>04 | -     |

| <b>1b</b> | -               | -               | -               | -                | -             | -               | -               | -               | -             |
|-----------|-----------------|-----------------|-----------------|------------------|---------------|-----------------|-----------------|-----------------|---------------|
| <b>1c</b> | 0.508±0.<br>005 | 0.884±0.<br>002 | 3.662±0.<br>002 | 0.183±0.0<br>04  | -             | 1.180±0.<br>010 | 0.390±0.<br>002 | 0.785±0.<br>004 | 2.70±0<br>.02 |
| <b>1d</b> | 0.713±0.<br>003 | 1.70±0.0<br>1   | 6.768±0.<br>010 | 0.0384±0.<br>007 | -             | -               | 0.764±0.<br>008 | 1.465±0.<br>002 | 4.66±0<br>.09 |
| <b>1e</b> | 1.23±0.0<br>3   | 1.940±0.<br>006 | 7.26±0.0<br>9   | 0.780±0.0<br>1   | 0.87±0<br>.02 | 1.43±0.0<br>4   | 0.714±0.<br>004 | 1.56±0.0<br>5   | 5.02±0<br>.05 |

\*\*\*288 K  $k_{\text{diss}}=3.55 \pm 0.03 \text{ s}^{-1}$ , total enhancement = 3200. It should be note that the  $k_{\text{diss}}$  rates correspond to the rate constant for the loss of one of the two axial ligands.

Table 2S: Full list of attributed signals enhancements for the *ortho*-, *meta*- and *para*- protons of pyridine and the total signal enhancement.

|           | pyridine at 298K |        |        |                   | pyridine at 313K |        |        |                   |
|-----------|------------------|--------|--------|-------------------|------------------|--------|--------|-------------------|
|           | ortho-H          | meta-H | para-H | total enhancement | ortho-H          | meta-H | para-H | total enhancement |
| <b>1b</b> | -0.77            | -0.14  | -0.32  | 2.32              |                  |        |        |                   |
| <b>1c</b> | -48.2            | -11.8  | -27.2  | 162.6             | -158.1           | -70.2  | -87.4  | 561.2             |
| <b>1d</b> | -95.2            | -32.8  | -47.8  | 318.8             | -196.4           | -82.6  | -119.2 | 713.8             |
| <b>1e</b> | -68.8            | -15    | -40.2  | 233.0             | -129.6           | -57    | -76.5  | 469.2             |

Table 3S. Full list of attributed signal enhancements observed for 3,4-lutidine, and the total signal enhancement.

|  | 3,4-lutidine at 298K | 3,4-lutidine at 313K |
|--|----------------------|----------------------|
|--|----------------------|----------------------|

|                  | H2 and H6 | H5   | CH <sub>3</sub> 3 and 4 | total | H2 and H6 | H5   | CH <sub>3</sub> 3 and 4 | total |
|------------------|-----------|------|-------------------------|-------|-----------|------|-------------------------|-------|
| <b>1a</b>        | -540      | -184 | -223                    | 1709  | -1150     | -715 | -607                    | 3080  |
| <b>1b</b>        |           |      |                         |       |           |      |                         |       |
| <b>1c</b>        | -138      | -54  | -70                     | 471   | -167      | -59  | -89                     | 570   |
| <b>1d</b>        | -173      | -56  | -79                     | 506   | -212      | -76  | -108                    | 716   |
| <b>1e</b>        | -67       | -24  | -33                     | 223   | -170      | -62  | -85                     | 572   |
| <b>1</b>         | -540      | -184 | -223                    | 1709  | -1150     | -715 | -607                    | 3080  |
| <b>1 at 288k</b> | -1800     | 679  | -728                    | 3207  |           |      |                         |       |

Table 4S. Full list of enhancement of 3,5-lutidine and the total enhancement

| <b>3,5-lutidine at 298K</b> |           |      |                         |       |
|-----------------------------|-----------|------|-------------------------|-------|
|                             | H2 and H6 | H4   | CH <sub>3</sub> 3 and 5 | total |
| <b>1a</b>                   | -290      | 27   | 66                      | 740   |
| <b>1b</b>                   | -3.       | -1   | -1                      | 11    |
| <b>1c</b>                   | -250      | -75  | -71                     | 719   |
| <b>1d</b>                   | -516      | -230 | -176                    | 1615  |
| <b>1e</b>                   | -173      | -91  | -67                     | 504   |

## **SABRE experiments, using Flow-apparatus**

### **<sup>1</sup>H NMR enhancements in the flow-apparatus**

#### **- Pyridine**

Table 5S. Signal enhancement levels for the *ortho*, *para* and *meta* protons respectively of pyridine observed when using catalyst **1d**.

| Field | Signal Enhancement (Fold) |             |             |
|-------|---------------------------|-------------|-------------|
|       | <i>ortho</i>              | <i>para</i> | <i>meta</i> |
| 0     | -19                       | -14         | 25          |
| 10    | -72                       | -51         | 41          |
| 20    | -73                       | -46         | 14          |
| 30    | -73                       | -45         | -3          |

|     |      |      |     |
|-----|------|------|-----|
| 40  | -93  | -57  | -14 |
| 50  | -130 | -80  | -49 |
| 60  | -150 | -96  | -78 |
| 70  | -175 | -107 | -95 |
| 80  | -165 | -100 | -82 |
| 90  | -117 | -74  | -48 |
| 100 | -97  | -63  | -44 |
| 110 | -81  | -55  | -60 |
| 120 | -85  | -54  | -68 |
| 130 | -79  | -50  | -39 |
| 140 | -69  | -46  | -9  |

### ***- 3,4-lutidine***

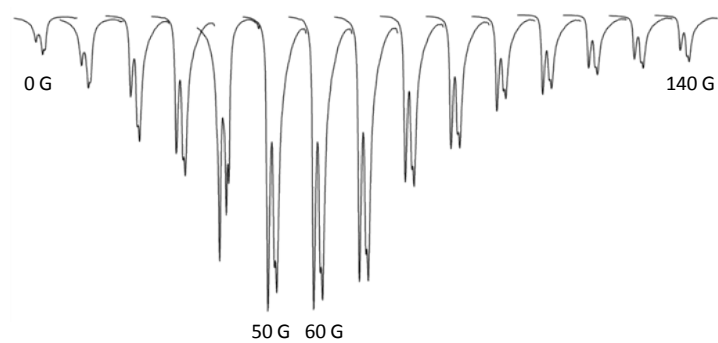

Figure 1S. Intensity of the H2 and H6 proton responses of 3,4-lutidine as a function of polarisation transfer field over the range 0 G to 140 G, in steps of 10 G.

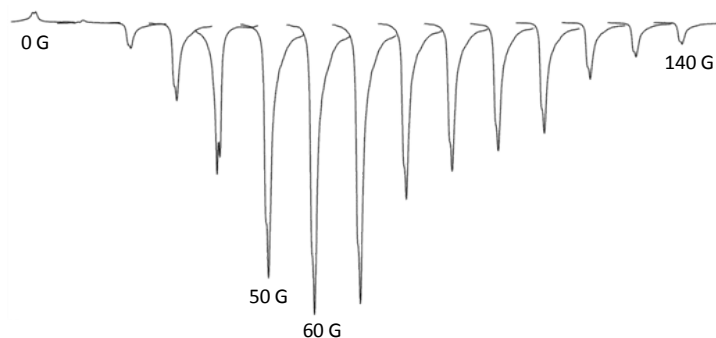

Figure 2S. Intensity of the H5 proton response of 3,4-lutidine as a function of polarisation transfer field over the range 0 G to 140 G, in steps of 10 G.

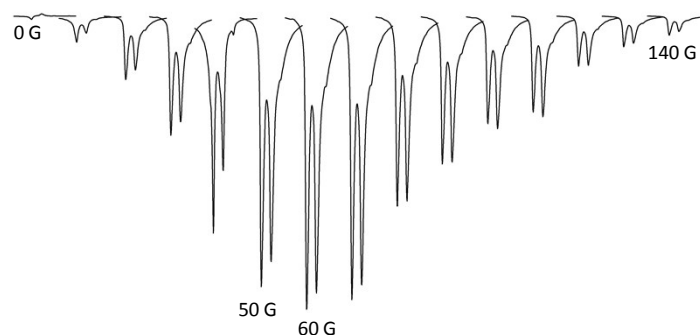

Figure 3S. Intensity of CH<sub>3</sub> protons at position 3 and 4 of 3,4-lutidine as a function of polarisation transfer field over the range 0 G to 140 G, in steps of 10 G.

Table 6S. <sup>1</sup>H NMR signal enhancements for H2, H5, H6, 3-CH<sub>3</sub> and 4-CH<sub>3</sub> respectively of 3,4-lutidine observed when using catalyst **1d** in the flow apparatus.

| Field (G) | Enhancement |     |             |
|-----------|-------------|-----|-------------|
|           | H2 and H6   | H5  | CH3 3 and 4 |
| 0         | -33         | 4   | -0.1        |
| 10        | -64         | 0.1 | -13         |
| 20        | -89         | -7  | -22         |
| 30        | -124        | -20 | -42         |
| 40        | -178        | -44 | -87         |
| 50        | -231        | -65 | -97         |
| 60        | -233        | -74 | -105        |

|     |      |     |      |
|-----|------|-----|------|
| 70  | -216 | -72 | -103 |
| 80  | -138 | -45 | -70  |
| 90  | -109 | -38 | -54  |
| 100 | -70  | -31 | -39  |
| 110 | -60  | -27 | -34  |
| 120 | -45  | -14 | -18  |
| 130 | -40  | -9  | -11  |
| 140 | -34  | -6  | -6   |

### ***-3,5-lutidine***

Table 7S. <sup>1</sup>H NMR signal enhancements for H2, H5, H6, 3-CH<sub>3</sub> and 4-CH<sub>3</sub> respectively of 3,5-lutidine observed when using catalyst **1d** in the flow apparatus.

| Field (G) | Enhancement      |           |                    |
|-----------|------------------|-----------|--------------------|
|           | <b>H2 and H6</b> | <b>H4</b> | <b>CH3 3 and 5</b> |
| 0         | -41              | -7        | 18                 |
| 10        | -91              | -20       | -3                 |
| 20        | -151             | -40       | -36                |
| 30        | -280             | -73       | -109               |
| 40        | -419             | -125      | -188               |

|     |      |      |      |
|-----|------|------|------|
| 50  | -574 | -210 | -312 |
| 60  | -671 | -242 | -408 |
| 70  | -695 | -302 | -490 |
| 80  | -691 | -339 | -508 |
| 90  | -459 | -222 | -343 |
| 100 | -348 | -162 | -252 |
| 110 | -254 | -110 | -161 |
| 120 | -218 | -89  | -110 |
| 130 | -184 | -67  | -68  |
| 140 | -160 | -53  | -40  |

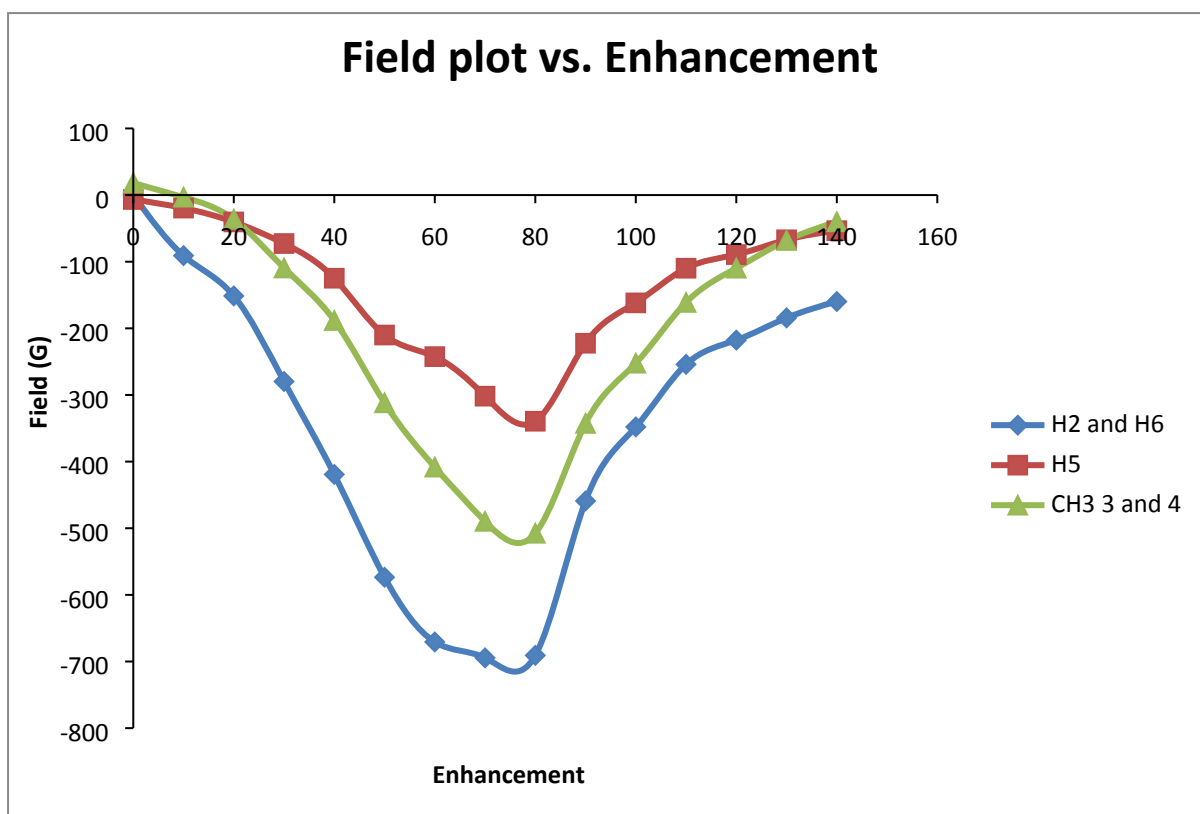

Figure 4S. Intensity of the indicated protons of 3,5-lutidine as a function of polarisation transfer field over the range 0 G to 140 G, in steps of 10 G.

## $^{13}\text{C}$ NMR enhancements data

- 3,4-lutidine

Complex 1a

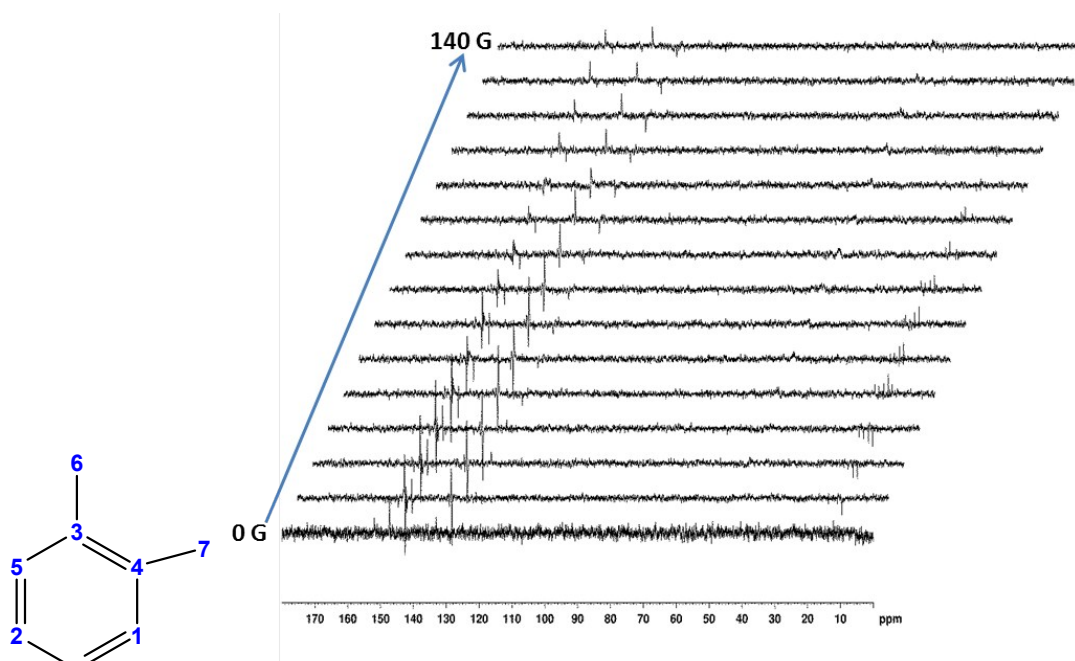

Complex 1d

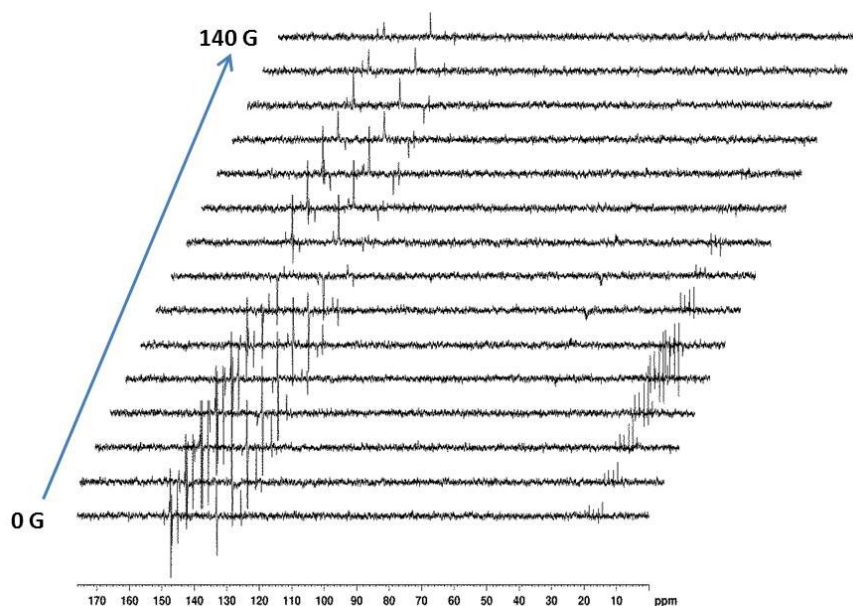

Figure 5S. Stack plot showing how the intensity of the polarised carbon peaks observed for 3,4-lutidine vary when using complex **1a** and **1d** respectively. Spectra were recorded in steps of 10 G over a polarisation field transfer field range of 0 G to 140 G.

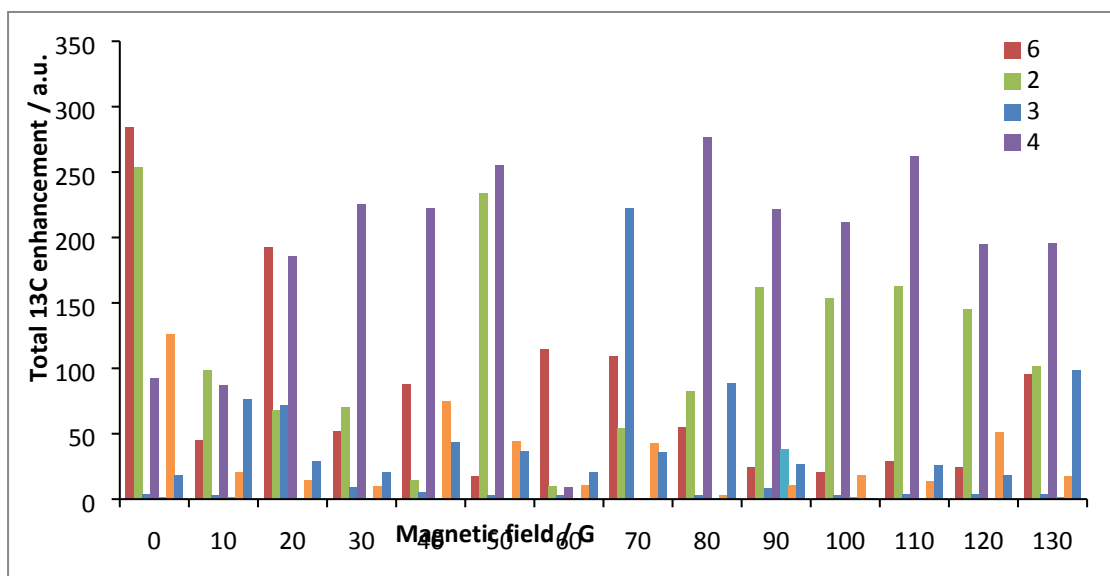

Figure 6S. Polarization transfer field profile for the indicated  $^{13}\text{C}$  NMR signals of 3,4-lutidine achieved when using complex **1d**.

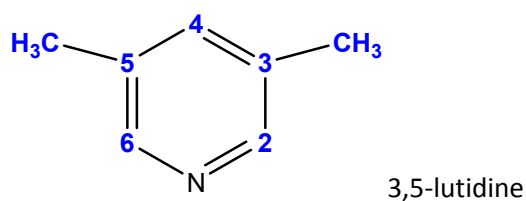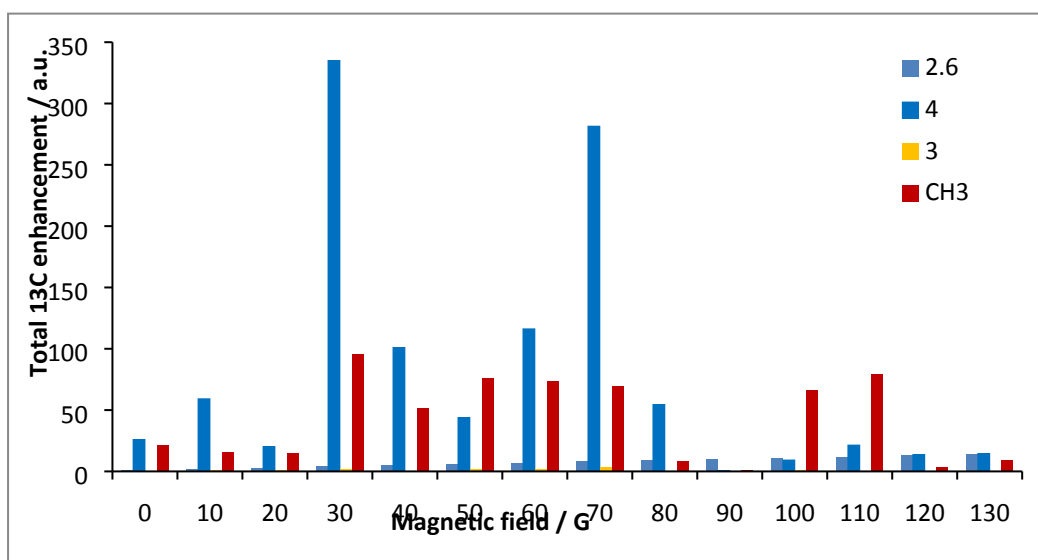

Figure 7S. Polarization transfer field profile for the polarised  $^{13}\text{C}$  NMR signals of 3,5-lutidine achieved with complex **1d**.

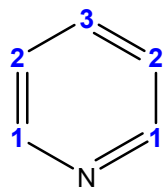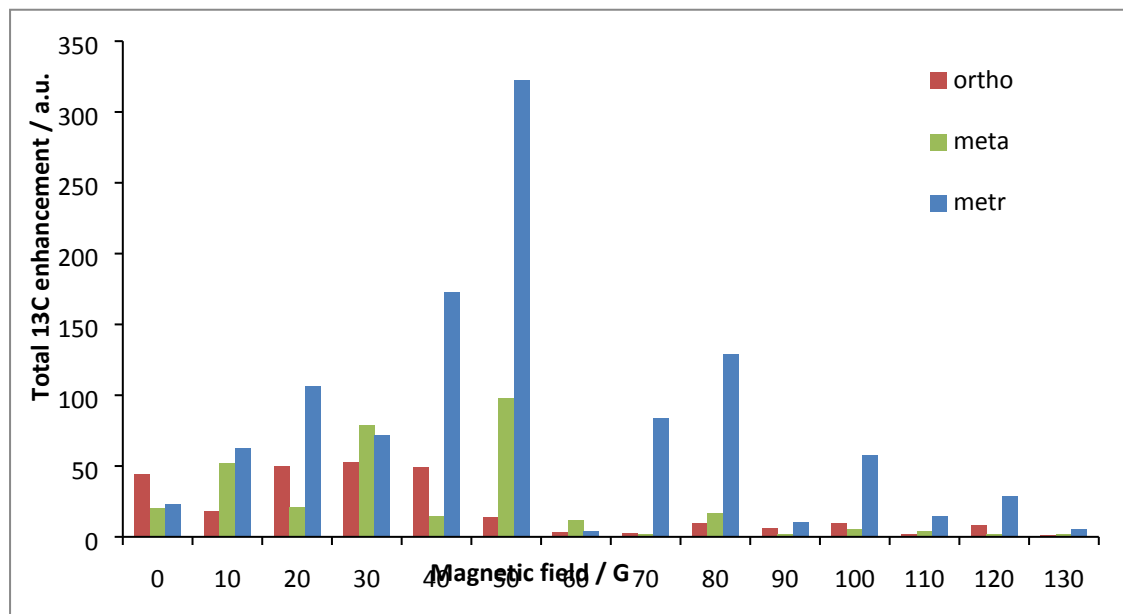

Figure 8S. Polarization transfer field profile of the polarised  $^{13}\text{C}$  NMR signals of pyridine achieved with complex **1a**.

Reactions of **1** with pyridine.

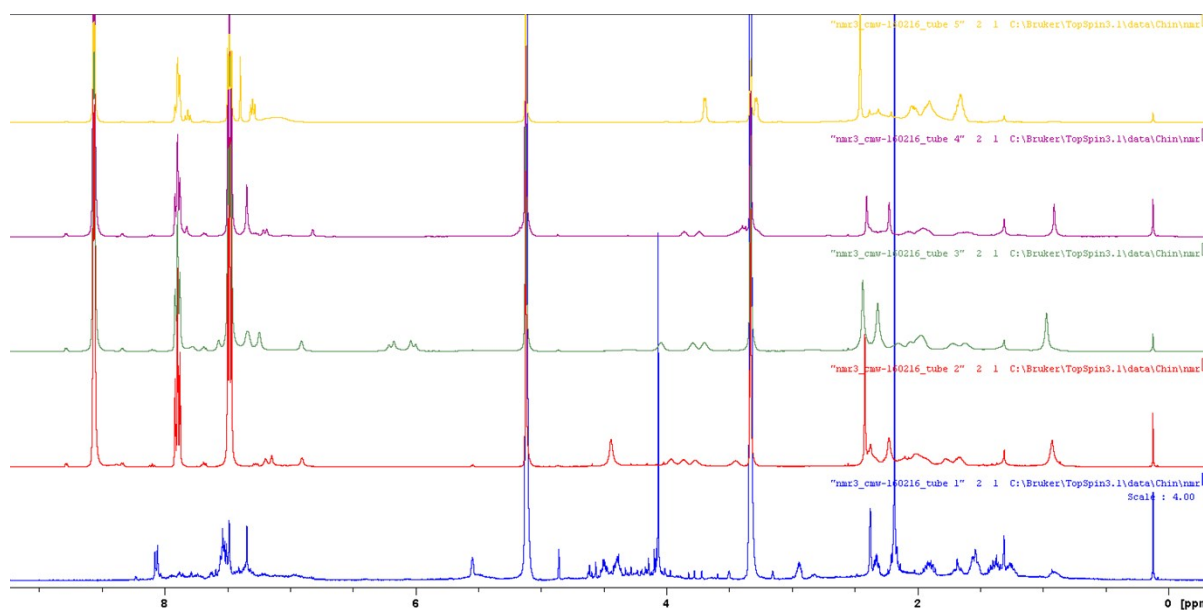

Figure 9S. NMR spectra detailing the changes associated with the addition of pyridine to samples of **1**. Conversion to  $[\text{Ir}(\text{py})(\text{NHC})(\text{COD})]\text{Cl}$  is only evident for **1a**.

## X-Ray analysis of 1e

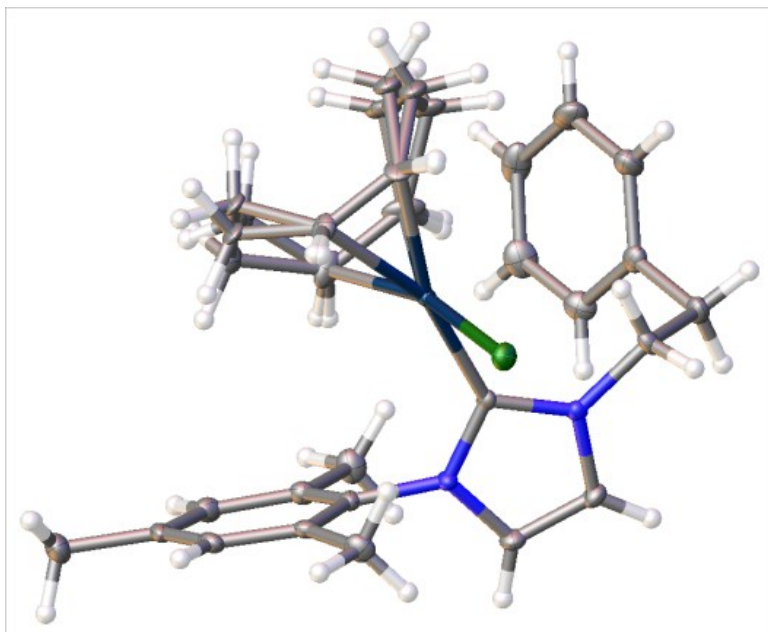

**Table 10S** Crystal data and structure refinement for **1e**.

|                       |                       |
|-----------------------|-----------------------|
| Identification code   | sbd1613               |
| Empirical formula     | $C_{28}H_{34}ClIrN_2$ |
| Formula weight        | 626.22                |
| Temperature/K         | 110.05(10)            |
| Crystal system        | triclinic             |
| Space group           | P-1                   |
| a/Å                   | 9.7423(3)             |
| b/Å                   | 11.0660(4)            |
| c/Å                   | 12.1673(4)            |
| $\alpha/^\circ$       | 100.717(3)            |
| $\beta/^\circ$        | 104.685(3)            |
| $\gamma/^\circ$       | 96.543(3)             |
| Volume/Å <sup>3</sup> | 1228.71(8)            |
| Z                     | 2                     |

|                                                |                                                               |
|------------------------------------------------|---------------------------------------------------------------|
| $\rho_{\text{calc}}/\text{g}/\text{cm}^3$      | 1.693                                                         |
| $\mu/\text{mm}^{-1}$                           | 11.642                                                        |
| F(000)                                         | 620.0                                                         |
| Crystal size/ $\text{mm}^3$                    | $0.2421 \times 0.1593 \times 0.1367$                          |
| Radiation                                      | $\text{CuK}\alpha$ ( $\lambda = 1.54184$ )                    |
| 2 $\theta$ range for data collection/ $^\circ$ | 7.706 to 142.354                                              |
| Index ranges                                   | $-11 \leq h \leq 11, -10 \leq k \leq 13, -14 \leq l \leq 13$  |
| Reflections collected                          | 7908                                                          |
| Independent reflections                        | 4638 [ $R_{\text{int}} = 0.0146, R_{\text{sigma}} = 0.0200$ ] |
| Data/restraints/parameters                     | 4638/0/305                                                    |
| Goodness-of-fit on $F^2$                       | 1.085                                                         |
| Final R indexes [ $ I  \geq 2\sigma(I)$ ]      | $R_1 = 0.0167, wR_2 = 0.0413$                                 |
| Final R indexes [all data]                     | $R_1 = 0.0172, wR_2 = 0.0415$                                 |
| Largest diff. peak/hole / $e \text{ \AA}^{-3}$ | 0.56/-1.03                                                    |

**Table S9 Fractional Atomic Coordinates ( $\times 10^4$ ) and Equivalent Isotropic Displacement Parameters ( $\text{\AA}^2 \times 10^3$ ) for sbd1613.  $U_{\text{eq}}$  is defined as 1/3 of the trace of the orthogonalised  $U_{ij}$  tensor.**

| Atom | x          | y           | z           | U(eq)      |
|------|------------|-------------|-------------|------------|
| Ir1  | 6209.9 (2) | 7775.6 (2)  | 7962.6 (2)  | 9.28 (4)   |
| Cl1  | 6641.4 (6) | 9158.8 (5)  | 9793.4 (5)  | 15.30 (11) |
| N2   | 8886 (2)   | 6621.7 (18) | 8864.5 (17) | 11.8 (4)   |
| N1   | 9501 (2)   | 8466.2 (18) | 8641.9 (16) | 11.3 (4)   |
| C11  | 8325 (2)   | 7591 (2)    | 8465.7 (19) | 9.9 (4)    |
| C12  | 8078 (3)   | 5421 (2)    | 8784 (2)    | 12.8 (5)   |
| C13  | 7318 (3)   | 5263 (2)    | 9594 (2)    | 14.2 (5)   |

|     |           |           |           |           |
|-----|-----------|-----------|-----------|-----------|
| C21 | 3913 (3)  | 7391 (2)  | 7747 (2)  | 17.2 (5)  |
| C24 | 5676 (3)  | 6171 (3)  | 6597 (2)  | 21.2 (6)  |
| C6  | 9626 (3)  | 9015 (2)  | 6297 (2)  | 16.5 (5)  |
| C17 | 8116 (3)  | 4432 (2)  | 7901 (2)  | 16.0 (5)  |
| C9  | 10758 (3) | 8067 (2)  | 9148 (2)  | 14.5 (5)  |
| C14 | 6490 (3)  | 4096 (2)  | 9437 (2)  | 16.1 (5)  |
| C25 | 5972 (3)  | 7243 (3)  | 6163 (2)  | 23.5 (6)  |
| C15 | 6463 (3)  | 3097 (2)  | 8540 (2)  | 16.8 (5)  |
| C10 | 10370 (3) | 6914 (2)  | 9288 (2)  | 15.5 (5)  |
| C16 | 7303 (3)  | 3274 (2)  | 7797 (2)  | 18.1 (5)  |
| C1  | 9959 (3)  | 7819 (3)  | 6061 (2)  | 20.1 (5)  |
| C8  | 9462 (3)  | 9694 (2)  | 8356 (2)  | 15.1 (5)  |
| C28 | 4198 (3)  | 8453 (2)  | 7335 (2)  | 18.5 (5)  |
| C18 | 7432 (3)  | 6294 (2)  | 10626 (2) | 19.5 (5)  |
| C7  | 10292 (3) | 9884 (2)  | 7471 (2)  | 17.8 (5)  |
| C5  | 8638 (3)  | 9380 (3)  | 5425 (2)  | 23.1 (6)  |
| C20 | 8990 (3)  | 4603 (3)  | 7062 (2)  | 22.4 (6)  |
| C3  | 8357 (3)  | 7396 (3)  | 4121 (2)  | 27.9 (7)  |
| C4  | 8018 (3)  | 8581 (3)  | 4345 (2)  | 27.7 (6)  |
| C2  | 9320 (3)  | 7009 (3)  | 4983 (2)  | 25.4 (6)  |
| C19 | 5571 (3)  | 1836 (3)  | 8391 (3)  | 25.3 (6)  |
| C23 | 4284 (6)  | 5335 (5)  | 6576 (5)  | 19.4 (10) |
| C30 | 4053 (9)  | 5632 (8)  | 6187 (7)  | 19.4 (10) |
| C22 | 3156 (12) | 6149 (11) | 6835 (8)  | 16.7 (15) |
| C29 | 3376 (18) | 6054 (17) | 7165 (12) | 16.7 (15) |

|     |           |           |           |           |
|-----|-----------|-----------|-----------|-----------|
| C26 | 4638 (7)  | 7592 (6)  | 5387 (5)  | 23.7 (11) |
| C31 | 5081 (10) | 8115 (9)  | 5511 (8)  | 23.7 (11) |
| C27 | 4054 (16) | 8591 (13) | 6114 (16) | 23 (2)    |
| C32 | 3750 (20) | 8320 (20) | 5980 (20) | 23 (2)    |

**Table S10 Anisotropic Displacement Parameters ( $\text{\AA}^2 \times 10^3$ ) for sbd1613. The Anisotropic displacement factor exponent takes the form:  $-2\pi^2[h^2a^{*2}U_{11}+2hka^*b^*U_{12}+\dots]$ .**

| Atom | $U_{11}$  | $U_{22}$  | $U_{33}$  | $U_{23}$  | $U_{13}$  | $U_{12}$  |
|------|-----------|-----------|-----------|-----------|-----------|-----------|
| Ir1  | 8.40 (6)  | 9.52 (6)  | 10.00 (6) | 3.34 (4)  | 1.76 (4)  | 1.78 (4)  |
| Cl1  | 16.4 (3)  | 13.1 (3)  | 15.2 (3)  | 0.1 (2)   | 4.9 (2)   | 1.7 (2)   |
| N2   | 9.4 (10)  | 12.2 (10) | 14.3 (9)  | 5.7 (8)   | 1.9 (8)   | 1.9 (8)   |
| N1   | 12 (1)    | 11.3 (9)  | 9.7 (9)   | 2.8 (7)   | 1.7 (7)   | 0.8 (8)   |
| C11  | 9.3 (11)  | 11.6 (11) | 9 (1)     | 3.0 (8)   | 3.3 (8)   | 0.4 (9)   |
| C12  | 11.2 (11) | 11.5 (11) | 14.5 (11) | 4.8 (9)   | 0.5 (9)   | 1.2 (9)   |
| C13  | 13.4 (12) | 16.8 (12) | 13.1 (11) | 7.1 (9)   | 1.5 (9)   | 4.6 (9)   |
| C21  | 10.1 (12) | 17.7 (12) | 23.7 (13) | 3.1 (10)  | 5.6 (10)  | 2.6 (10)  |
| C24  | 17.6 (13) | 21.7 (13) | 18.5 (13) | -8.4 (10) | 6.4 (10)  | -1.9 (11) |
| C6   | 16.5 (12) | 19.2 (12) | 14.4 (12) | 5.5 (10)  | 6.1 (10)  | -1.2 (10) |
| C17  | 16.5 (12) | 16.7 (12) | 14.8 (11) | 5.5 (9)   | 3.1 (10)  | 2.9 (10)  |
| C9   | 9.4 (11)  | 17.1 (12) | 15.6 (11) | 3.2 (9)   | 1.7 (9)   | 1.1 (9)   |
| C14  | 14.7 (12) | 19.2 (13) | 17.2 (12) | 11.6 (10) | 4.1 (10)  | 3.5 (10)  |
| C25  | 23.8 (14) | 40.7 (17) | 8.9 (11)  | 6.0 (11)  | 4.7 (10)  | 15.9 (13) |
| C15  | 13.9 (12) | 13.6 (12) | 21.1 (12) | 9.3 (10)  | -1.9 (10) | 0.9 (10)  |
| C10  | 11.5 (12) | 17.1 (12) | 17.5 (12) | 5.6 (9)   | 1.4 (9)   | 4.6 (9)   |
| C16  | 20.6 (13) | 14.9 (12) | 16.0 (12) | 3.0 (9)   | 0.8 (10)  | 2.7 (10)  |

|     |           |           |           |           |           |           |
|-----|-----------|-----------|-----------|-----------|-----------|-----------|
| C1  | 22.1 (14) | 24.1 (14) | 18.8 (13) | 7.1 (10)  | 11.0 (11) | 7.2 (11)  |
| C8  | 21.1 (13) | 10.0 (11) | 14.4 (11) | 4.3 (9)   | 4.8 (10)  | 1.7 (9)   |
| C28 | 10.3 (12) | 18.7 (13) | 27.2 (14) | 7.3 (10)  | 1.9 (10)  | 9.8 (10)  |
| C18 | 25.0 (14) | 20.7 (13) | 15.6 (12) | 6.3 (10)  | 8.5 (10)  | 4.7 (11)  |
| C7  | 19.6 (13) | 16.9 (12) | 16.1 (12) | 6.3 (10)  | 4.3 (10)  | -2.5 (10) |
| C5  | 27.3 (15) | 21.8 (13) | 20.0 (13) | 9.4 (11)  | 3.9 (11)  | 1.7 (11)  |
| C20 | 26.8 (15) | 20.7 (13) | 21.3 (13) | 3 (1)     | 11.3 (11) | 2.4 (11)  |
| C3  | 34.4 (17) | 32.2 (16) | 13.8 (13) | -0.4 (11) | 11.3 (12) | -8.6 (13) |
| C4  | 28.3 (15) | 37.8 (17) | 15.2 (13) | 11.8 (12) | 1.4 (11)  | -1.2 (13) |
| C2  | 33.5 (16) | 24.9 (14) | 21.0 (14) | 1.1 (11)  | 16.4 (12) | 4.8 (12)  |
| C19 | 26.9 (15) | 18.7 (13) | 28.1 (15) | 10.5 (11) | 2.8 (12)  | -2.3 (11) |
| C23 | 20 (2)    | 14 (3)    | 20 (3)    | 0.4 (17)  | 2 (2)     | -0.2 (18) |
| C30 | 20 (2)    | 14 (3)    | 20 (3)    | 0.4 (17)  | 2 (2)     | -0.2 (18) |
| C22 | 6 (4)     | 18 (2)    | 21 (5)    | 6 (3)     | -4 (4)    | -2 (2)    |
| C29 | 6 (4)     | 18 (2)    | 21 (5)    | 6 (3)     | -4 (4)    | -2 (2)    |
| C26 | 18 (3)    | 38 (4)    | 14.6 (19) | 14 (3)    | -1 (2)    | 5 (2)     |
| C31 | 18 (3)    | 38 (4)    | 14.6 (19) | 14 (3)    | -1 (2)    | 5 (2)     |
| C27 | 13 (7)    | 24 (6)    | 26 (4)    | 10 (5)    | -6 (4)    | 2 (4)     |
| C32 | 13 (7)    | 24 (6)    | 26 (4)    | 10 (5)    | -6 (4)    | 2 (4)     |

**Table S11 Bond Lengths for sbd1613.**

| Atom | Atom | Length/Å   | Atom | Atom | Length/Å  |
|------|------|------------|------|------|-----------|
| Ir1  | Cl1  | 2.3648 (6) | C6   | C1   | 1.394 (4) |
| Ir1  | C11  | 2.041 (2)  | C6   | C7   | 1.504 (3) |
| Ir1  | C21  | 2.168 (2)  | C6   | C5   | 1.395 (4) |

|     |     |            |     |     |            |
|-----|-----|------------|-----|-----|------------|
| Ir1 | C24 | 2.107 (2)  | C17 | C16 | 1.394 (4)  |
| Ir1 | C25 | 2.104 (2)  | C17 | C20 | 1.509 (3)  |
| Ir1 | C28 | 2.185 (2)  | C9  | C10 | 1.343 (3)  |
| N2  | C11 | 1.369 (3)  | C14 | C15 | 1.394 (4)  |
| N2  | C12 | 1.439 (3)  | C25 | C26 | 1.536 (6)  |
| N2  | C10 | 1.384 (3)  | C25 | C31 | 1.563 (9)  |
| N1  | C11 | 1.357 (3)  | C15 | C16 | 1.389 (4)  |
| N1  | C9  | 1.384 (3)  | C15 | C19 | 1.511 (3)  |
| N1  | C8  | 1.465 (3)  | C1  | C2  | 1.391 (4)  |
| C12 | C13 | 1.397 (3)  | C8  | C7  | 1.532 (3)  |
| C12 | C17 | 1.395 (3)  | C28 | C27 | 1.49 (2)   |
| C13 | C14 | 1.396 (3)  | C28 | C32 | 1.56 (3)   |
| C13 | C18 | 1.502 (3)  | C5  | C4  | 1.384 (4)  |
| C21 | C28 | 1.388 (4)  | C3  | C4  | 1.384 (4)  |
| C21 | C22 | 1.565 (12) | C3  | C2  | 1.386 (4)  |
| C21 | C29 | 1.486 (18) | C23 | C22 | 1.553 (14) |
| C24 | C25 | 1.414 (4)  | C30 | C29 | 1.53 (2)   |
| C24 | C23 | 1.544 (6)  | C26 | C27 | 1.54 (2)   |
| C24 | C30 | 1.542 (9)  | C31 | C32 | 1.57 (3)   |

**Table S12 Bond Angles for sbd1613.**

| Atom Atom Atom |     |     | Angle/°     | Atom Atom Atom |     |     | Angle/°   |
|----------------|-----|-----|-------------|----------------|-----|-----|-----------|
| C11            | Ir1 | Cl1 | 87.05 (6)   | C30            | C24 | Ir1 | 113.1 (3) |
| C11            | Ir1 | C21 | 158.38 (10) | C1             | C6  | C7  | 120.9 (2) |
| C11            | Ir1 | C24 | 93.11 (10)  | C1             | C6  | C5  | 118.4 (2) |

|     |     |     |             |     |     |     |            |
|-----|-----|-----|-------------|-----|-----|-----|------------|
| C11 | Ir1 | C25 | 95.36 (10)  | C5  | C6  | C7  | 120.7 (2)  |
| C11 | Ir1 | C28 | 164.24 (10) | C12 | C17 | C20 | 121.5 (2)  |
| C21 | Ir1 | Cl1 | 92.51 (7)   | C16 | C17 | C12 | 118.2 (2)  |
| C21 | Ir1 | C28 | 37.17 (10)  | C16 | C17 | C20 | 120.3 (2)  |
| C24 | Ir1 | Cl1 | 163.76 (8)  | C10 | C9  | N1  | 106.6 (2)  |
| C24 | Ir1 | C21 | 81.39 (10)  | C15 | C14 | C13 | 121.9 (2)  |
| C24 | Ir1 | C28 | 94.24 (11)  | C24 | C25 | Ir1 | 70.49 (14) |
| C25 | Ir1 | Cl1 | 156.91 (9)  | C24 | C25 | C26 | 114.1 (3)  |
| C25 | Ir1 | C21 | 93.46 (11)  | C24 | C25 | C31 | 136.8 (4)  |
| C25 | Ir1 | C24 | 39.24 (11)  | C26 | C25 | Ir1 | 114.5 (3)  |
| C25 | Ir1 | C28 | 81.71 (10)  | C31 | C25 | Ir1 | 109.8 (4)  |
| C28 | Ir1 | Cl1 | 89.75 (7)   | C14 | C15 | C19 | 121.1 (2)  |
| C11 | N2  | C12 | 125.5 (2)   | C16 | C15 | C14 | 118.5 (2)  |
| C11 | N2  | C10 | 110.8 (2)   | C16 | C15 | C19 | 120.3 (2)  |
| C10 | N2  | C12 | 123.5 (2)   | C9  | C10 | N2  | 107.2 (2)  |
| C11 | N1  | C9  | 111.6 (2)   | C15 | C16 | C17 | 121.6 (2)  |
| C11 | N1  | C8  | 124.9 (2)   | C2  | C1  | C6  | 120.8 (3)  |
| C9  | N1  | C8  | 123.6 (2)   | N1  | C8  | C7  | 112.3 (2)  |
| N2  | C11 | Ir1 | 127.67 (17) | C21 | C28 | Ir1 | 70.76 (14) |
| N1  | C11 | Ir1 | 127.86 (17) | C21 | C28 | C27 | 129.7 (5)  |
| N1  | C11 | N2  | 103.86 (19) | C21 | C28 | C32 | 117.3 (7)  |
| C13 | C12 | N2  | 120.1 (2)   | C27 | C28 | Ir1 | 108.5 (7)  |
| C17 | C12 | N2  | 117.9 (2)   | C32 | C28 | Ir1 | 112.7 (11) |
| C17 | C12 | C13 | 122.0 (2)   | C6  | C7  | C8  | 112.8 (2)  |
| C12 | C13 | C18 | 121.4 (2)   | C4  | C5  | C6  | 120.9 (3)  |

|     |     |     |            |     |     |     |            |
|-----|-----|-----|------------|-----|-----|-----|------------|
| C14 | C13 | C12 | 117.7 (2)  | C4  | C3  | C2  | 119.8 (3)  |
| C14 | C13 | C18 | 120.9 (2)  | C3  | C4  | C5  | 120.2 (3)  |
| C28 | C21 | Ir1 | 72.07 (14) | C3  | C2  | C1  | 119.9 (3)  |
| C28 | C21 | C22 | 118.1 (4)  | C24 | C23 | C22 | 110.3 (6)  |
| C28 | C21 | C29 | 133.2 (5)  | C29 | C30 | C24 | 109.4 (8)  |
| C22 | C21 | Ir1 | 112.6 (5)  | C23 | C22 | C21 | 110.6 (7)  |
| C29 | C21 | Ir1 | 108.4 (7)  | C21 | C29 | C30 | 111.8 (12) |
| C25 | C24 | Ir1 | 70.27 (15) | C25 | C26 | C27 | 109.9 (7)  |
| C25 | C24 | C23 | 134.3 (3)  | C25 | C31 | C32 | 110.2 (11) |
| C25 | C24 | C30 | 111.3 (4)  | C28 | C27 | C26 | 114.2 (11) |
| C23 | C24 | Ir1 | 111.5 (2)  | C28 | C32 | C31 | 109.3 (14) |

**Table S13 Torsion Angles for sbd1613.**

| A   | B   | C   | D   | Angle/°    | A   | B   | C   | D   | Angle/°     |
|-----|-----|-----|-----|------------|-----|-----|-----|-----|-------------|
| Ir1 | C21 | C28 | C27 | 98.4 (9)   | C6  | C5  | C4  | C3  | 1.0 (4)     |
| Ir1 | C21 | C28 | C32 | 106.2 (12) | C17 | C12 | C13 | C14 | -5.2 (4)    |
| Ir1 | C21 | C22 | C23 | 15.6 (7)   | C17 | C12 | C13 | C18 | 172.4 (2)   |
| Ir1 | C21 | C29 | C30 | -41.3 (8)  | C9  | N1  | C11 | Ir1 | 170.82 (16) |
| Ir1 | C24 | C25 | C26 | -108.9 (3) | C9  | N1  | C11 | N2  | -0.7 (3)    |
| Ir1 | C24 | C25 | C31 | -98.5 (6)  | C9  | N1  | C8  | C7  | 61.3 (3)    |
| Ir1 | C24 | C23 | C22 | 40.4 (6)   | C14 | C15 | C16 | C17 | -2.6 (4)    |
| Ir1 | C24 | C30 | C29 | -23.0 (8)  | C25 | C24 | C23 | C22 | -42.6 (7)   |
| Ir1 | C25 | C26 | C27 | 17.3 (8)   | C25 | C24 | C30 | C29 | -99.8 (8)   |
| Ir1 | C25 | C31 | C32 | -44.2 (10) | C25 | C26 | C27 | C28 | -35.4 (9)   |
| Ir1 | C28 | C27 | C26 | 35.6 (8)   | C25 | C31 | C32 | C28 | 39.3 (14)   |

|                 |            |                 |             |
|-----------------|------------|-----------------|-------------|
| Ir1 C28 C32 C31 | -17.1 (14) | C10 N2 C11 Ir1  | 170.73 (17) |
| N2 C12 C13 C14  | 176.6 (2)  | C10 N2 C11 N1   | 0.8 (3)     |
| N2 C12 C13 C18  | -5.9 (3)   | C10 N2 C12 C13  | 103.9 (3)   |
| N2 C12 C17 C16  | -178.2 (2) | C10 N2 C12 C17  | -74.5 (3)   |
| N2 C12 C17 C20  | 0.8 (4)    | C1 C6 C7 C8     | -85.8 (3)   |
| N1 C9 C10 N2    | 0.2 (3)    | C1 C6 C5 C4     | -0.9 (4)    |
| N1 C8 C7 C6     | 65.3 (3)   | C8 N1 C11 Ir1   | -8.2 (3)    |
| C11 N2 C12 C13  | -81.0 (3)  | C8 N1 C11 N2    | -179.7 (2)  |
| C11 N2 C12 C17  | 100.7 (3)  | C8 N1 C9 C10    | 179.4 (2)   |
| C11 N2 C10 C9   | -0.7 (3)   | C28 C21 C22 C23 | 96.7 (5)    |
| C11 N1 C9 C10   | 0.3 (3)    | C28 C21 C29 C30 | 41.1 (13)   |
| C11 N1 C8 C7    | -119.8 (2) | C18 C13 C14 C15 | -174.6 (2)  |
| C12 N2 C11 Ir1  | 13.6 (3)   | C7 C6 C1 C2     | 178.7 (2)   |
| C12 N2 C11 N1   | -174.8 (2) | C7 C6 C5 C4     | -179.8 (2)  |
| C12 N2 C10 C9   | 175.1 (2)  | C5 C6 C1 C2     | -0.2 (4)    |
| C12 C13 C14 C15 | 2.9 (4)    | C5 C6 C7 C8     | 93.1 (3)    |
| C12 C17 C16 C15 | 0.5 (4)    | C20 C17 C16 C15 | -178.5 (2)  |
| C13 C12 C17 C16 | 3.5 (4)    | C4 C3 C2 C1     | -1.0 (4)    |
| C13 C12 C17 C20 | -177.5 (2) | C2 C3 C4 C5     | 0.0 (4)     |
| C13 C14 C15 C16 | 0.9 (4)    | C19 C15 C16 C17 | 178.8 (2)   |
| C13 C14 C15 C19 | 179.4 (2)  | C23 C24 C25 Ir1 | 101.2 (4)   |
| C21 C28 C27 C26 | -44.3 (12) | C23 C24 C25 C26 | -7.7 (5)    |
| C21 C28 C32 C31 | -96.3 (10) | C30 C24 C25 Ir1 | 107.9 (4)   |
| C24 C25 C26 C27 | 95.9 (7)   | C30 C24 C25 C31 | 9.4 (7)     |
| C24 C25 C31 C32 | 38.0 (12)  | C22 C21 C28 Ir1 | -106.6 (5)  |

|                 |           |                 |            |
|-----------------|-----------|-----------------|------------|
| C24 C23 C22 C21 | -35.7 (8) | C22 C21 C28 C27 | -8.2 (11)  |
| C24 C30 C29 C21 | 42.6 (10) | C29 C21 C28 Ir1 | -98.8 (10) |
| C6 C1 C2 C3     | 1.1 (4)   | C29 C21 C28 C32 | 7.5 (15)   |

**Table S14 Hydrogen Atom Coordinates ( $\text{\AA}\times 10^4$ ) and Isotropic Displacement Parameters ( $\text{\AA}^2\times 10^3$ ) for sbd1613.**

| Atom | x     | y | z     | U(eq) |    |
|------|-------|---|-------|-------|----|
| H21  | 3623  |   | 7525  | 8469  | 21 |
| H21A | 3694  |   | 7597  | 8496  | 21 |
| H24  | 6475  |   | 5700  | 6656  | 25 |
| H24A | 6354  |   | 5581  | 6614  | 25 |
| H9   | 11689 |   | 8511  | 9351  | 17 |
| H14  | 5941  |   | 3982  | 9945  | 19 |
| H25  | 6855  |   | 7335  | 5919  | 28 |
| H25A | 6920  |   | 7290  | 6020  | 28 |
| H10  | 10984 |   | 6408  | 9610  | 19 |
| H16  | 7323  |   | 2604  | 7216  | 22 |
| H1   | 10617 |   | 7560  | 6631  | 24 |
| H8A  | 9874  |   | 10337 | 9064  | 18 |
| H8B  | 8469  |   | 9782  | 8042  | 18 |
| H28  | 4118  |   | 9218  | 7851  | 22 |
| H28A | 4086  |   | 9239  | 7801  | 22 |
| H18A | 8427  |   | 6575  | 11054 | 29 |
| H18B | 6916  |   | 5989  | 11121 | 29 |
| H18C | 7028  |   | 6975  | 10361 | 29 |
| H7A  | 10328 |   | 10738 | 7380  | 21 |
| H7B  | 11273 |   | 9754  | 7770  | 21 |

|      |      |       |      |    |
|------|------|-------|------|----|
| H5   | 8392 | 10170 | 5570 | 28 |
| H20A | 8736 | 5286  | 6714 | 34 |
| H20B | 8793 | 3854  | 6464 | 34 |
| H20C | 9996 | 4777  | 7475 | 34 |
| H3   | 7939 | 6860  | 3395 | 33 |
| H4   | 7373 | 8842  | 3768 | 33 |
| H2   | 9538 | 6208  | 4839 | 30 |
| H19A | 6053 | 1414  | 8959 | 38 |
| H19B | 5448 | 1348  | 7622 | 38 |
| H19C | 4646 | 1946  | 8497 | 38 |
| H23A | 4503 | 4837  | 7155 | 23 |
| H23B | 3890 | 4772  | 5816 | 23 |
| H30A | 3593 | 5921  | 5502 | 23 |
| H30B | 3915 | 4728  | 5982 | 23 |
| H22A | 2482 | 5687  | 7135 | 20 |
| H22B | 2619 | 6340  | 6119 | 20 |
| H29A | 2338 | 5926  | 6846 | 20 |
| H29B | 3594 | 5547  | 7737 | 20 |
| H26A | 3901 | 6857  | 5044 | 28 |
| H26B | 4890 | 7909  | 4760 | 28 |
| H31A | 4754 | 7744  | 4682 | 28 |
| H31B | 5684 | 8914  | 5626 | 28 |
| H27A | 4561 | 9407  | 6139 | 27 |
| H27B | 3044 | 8557  | 5727 | 27 |
| H32A | 3400 | 9063  | 5798 | 27 |

**Table S15 Atomic Occupancy for sbd1613.**

| Atom | Occupancy | Atom | Occupancy | Atom | Occupancy |
|------|-----------|------|-----------|------|-----------|
| H21  | 0.576 (5) | H21A | 0.424 (5) | H24  | 0.576 (5) |
| H24A | 0.424 (5) | H25  | 0.576 (5) | H25A | 0.424 (5) |
| H28  | 0.576 (5) | H28A | 0.424 (5) | C23  | 0.576 (5) |
| H23A | 0.576 (5) | H23B | 0.576 (5) | C30  | 0.424 (5) |
| H30A | 0.424 (5) | H30B | 0.424 (5) | C22  | 0.576 (5) |
| H22A | 0.576 (5) | H22B | 0.576 (5) | C29  | 0.424 (5) |
| H29A | 0.424 (5) | H29B | 0.424 (5) | C26  | 0.576 (5) |
| H26A | 0.576 (5) | H26B | 0.576 (5) | C31  | 0.424 (5) |
| H31A | 0.424 (5) | H31B | 0.424 (5) | C27  | 0.576 (5) |
| H27A | 0.576 (5) | H27B | 0.576 (5) | C32  | 0.424 (5) |
| H32A | 0.424 (5) | H32B | 0.424 (5) |      |           |

**Experimental**

Single crystals of  $C_{28}H_{34}ClIrN_2$  [sbd1613] were selected and placed in a micromount on a SuperNova, Dual, Cu at zero, Eos diffractometer. The crystal was kept at 110.05(10) K during data collection. Using Olex2 [1], the structure was solved with the ShelXT [2] structure solution program using Direct Methods and refined with the ShelXL [3] refinement package using Least Squares minimisation.

1. Dolomanov, O.V., Bourhis, L.J., Gildea, R.J., Howard, J.A.K. & Puschmann, H. (2009), J. Appl. Cryst. 42, 339-341.
2. Sheldrick, G.M. (2015). Acta Cryst. A71, 3-8.
3. Sheldrick, G.M. (2015). Acta Cryst. C71, 3-8.

**Crystal structure determination of [sbd1613]**

**Crystal Data for  $C_{28}H_{34}ClIrN_2$  ( $M=626.22$  g/mol):** triclinic, space group P-1 (no. 2),  $a = 9.7423(3)$  Å,  $b = 11.0660(4)$  Å,  $c = 12.1673(4)$  Å,  $\alpha = 100.717(3)^\circ$ ,  $\beta = 104.685(3)^\circ$ ,  $\gamma = 96.543(3)^\circ$ ,  $V = 1228.71(8)$  Å<sup>3</sup>,  $Z = 2$ ,  $T = 110.05(10)$  K,  $\mu(\text{CuK}\alpha) = 11.642$  mm<sup>-1</sup>,  $D_{\text{calc}} = 1.693$  g/cm<sup>3</sup>, 7908 reflections measured ( $7.706^\circ \leq 2\theta \leq 142.354^\circ$ ), 4638 unique ( $R_{\text{int}} = 0.0146$ ,  $R_{\text{sigma}} = 0.0200$ ) which were used in all calculations. The final  $R_1$  was 0.0167 ( $I > 2\sigma(I)$ ) and  $wR_2$  was 0.0415 (all data).

**Refinement model description** Number of restraints - 0, number of constraints - unknown.

Details:

1. Fixed Uiso  
At 1.2 times of:  
All C(H) groups, All C(H,H) groups  
At 1.5 times of:  
All C(H,H,H) groups
2. Uiso/Uanis restraints and constraints

Uanis(C23) = Uanis(C30)  
 Uanis(C26) = Uanis(C31)  
 Uanis(C27) = Uanis(C32)  
 Uanis(C22) = Uanis(C29)

3. Others

Sof(H21A)=Sof(H24A)=Sof(H25A)=Sof(H28A)=Sof(C30)=Sof(H30A)=Sof(H30B)=Sof(C29)=  
 Sof(H29A)=Sof(H29B)=Sof(C31)=Sof(H31A)=Sof(H31B)=Sof(C32)=Sof(H32A)=Sof(H32B)=  
 1-FVAR(1)  
 Sof(H21)=Sof(H24)=Sof(H25)=Sof(H28)=Sof(C23)=Sof(H23A)=Sof(H23B)=Sof(C22)=  
 Sof(H22A)=Sof(H22B)=Sof(C26)=Sof(H26A)=Sof(H26B)=Sof(C27)=Sof(H27A)=Sof(H27B)=  
 FVAR(1)

4.a Ternary CH refined with riding coordinates:  
 C21(H21), C21(H21A), C24(H24), C24(H24A), C25(H25), C25(H25A), C28(H28),  
 C28(H28A)

4.b Secondary CH2 refined with riding coordinates:  
 C8(H8A,H8B), C7(H7A,H7B), C23(H23A,H23B), C30(H30A,H30B), C22(H22A,H22B),  
 C29(H29A,H29B), C26(H26A,H26B), C31(H31A,H31B), C27(H27A,H27B), C32(H32A,H32B)

4.c Aromatic/amide H refined with riding coordinates:  
 C9(H9), C14(H14), C10(H10), C16(H16), C1(H1), C5(H5), C3(H3), C4(H4), C2(H2)

4.d Idealised Me refined as rotating group:  
 C18(H18A,H18B,H18C), C20(H20A,H20B,H20C), C19(H19A,H19B,H19C)

This report has been created with Olex2, compiled on 2016.02.19 svn.r3266 for OlexSys.

## References

1. J. Choudhury, S. Podder and S. Roy, *Journal of the American Chemical Society*, 2005, **127**, 6162-6163.
2. L. Zhu, P. Guo, G. Li, J. Lan, R. Xie and J. You, *Journal of Organic Chemistry*, 2007, **72**, 8535-8538.
3. A. J. Ruddlesden, R. E. Mewis, G. G. R. Green, A. C. Whitwood and S. B. Duckett, *Organometallics*, 2015, **34**, 2997-3006.
4. C. Nieto-Oberhuber, M. P. Munoz, S. Lopez, E. Jimenez-Nunez, C. Nevado, E. Herrero-Gomez, M. Raducan and A. M. Echavarren, *Chemistry - A European Journal*, 2006, **12**, 1677-1693.
5. B. Eguillor, M. A. Esteruelas, M. Oliván and M. Puerta, *Organometallics*, 2008, **27**, 445-450.
6. L. S. Lloyd, R. W. Adams, M. Bernstein, S. Coombes, S. B. Duckett, G. G. R. Green, R. J. Lewis, R. E. Mewis and C. J. Sleight, *Journal of the American Chemical Society*, 2012, **134**, 12904-12907.
7. R. V. Shchepin, L. Jaigirdar, T. Theis, W. S. Warren, B. M. Goodson and E. Y. Chekmenev, *J. Phys. Chem. C*, 2017, **121**, 28425-28434.
